# Supplementary material for: Furanyl bis(indolyl)methane as a palladium ion-selective chromogenic agent
Source: Royal Society of Chemistry journal article supplement (doi:10.1039/d4ob00046c), 2024-01-01

## Electronic Supplementary Information

# Furanyl Bis(indolyl)methane as a Palladium Ion-Selective Chromogenic Agent

Kazuho Ban,<sup>a</sup> Shiho Nozaki,<sup>a</sup> Takaaki Aijima,<sup>a</sup> Shuki Oyama,<sup>a</sup> Hirofumi Tsujino,<sup>a</sup> Yusuke Kanematsu,<sup>b</sup> Shuji Akai<sup>a</sup> and Yoshinari Sawama<sup>\*a</sup>

<sup>a</sup>Graduate School of Pharmaceutical Sciences, Osaka University, 1-6, Yamada-oka, Suita, Osaka 565-0871, Japan.

<sup>b</sup> Graduate School of Advanced Science and Engineering, Hiroshima University, 1-4-1 Kagamiyama, Higashi-Hiroshima, Hiroshima 739-8527, Japan.

E-mail: sawama@phs.osaka-u.ac.jp

## Contents

1. General information.
2. Preparation of 5-chloromethyl-furan-2-yl bis(indolyl)methane (5)
3. Preparation and spectroscopic data of 5-aminomethyl furan-2-yl bis(indolyl)methanes (4) (Table 2).
  - 3-1. General procedure for synthesis of 4.
  - 3-2. Spectroscopic data of 4.
4. Optimization to synthesize 4a.
  - 4-1. Effect of solvent.
  - 4-2. Effect of acid catalyst.
  - 4-3. Effect of drying reagent.
5. Procedure of analysis of chromogenic properties (Figures 3, 4, and 5).
  - 5-1. Preparation of the stock solutions of BIM or metal ion.
  - 5-2. Effect of mixture ratio of BIM 4a and metal ion.
  - 5-3. Procedure for UV-Vis analysis (Figures 3 and 4).
  - 5-4. Time course study of UV-Vis absorption of the mixture of 4a and Pd<sup>2+</sup> ion.
  - 5-5. Effect of concentration of Pd<sup>2+</sup> salt solution.
6. Chromogenic property of 5-amine unit-substituted furan-2-yl BIM derivatives (4b-4e).

- 7. Preparation and spectroscopic data of bis(indolyl)methyl compounds (6) (Figure 4).**
- 8. UV-Vis absorbance property of 6a.**
- 9. UV-Vis absorbance property of 4b.**
- 10. References.**
- 11.  $^1\text{H}$  NMR and  $^{13}\text{C}$  NMR spectra of products.**

## 1. General information.

Flash column chromatography was performed with Silica Gel 60 N (Kanto Chemical Co., Inc., 63—210  $\mu\text{m}$  spherical, neutral).  $^1\text{H}$  NMR and  $^{13}\text{C}$  NMR spectra were recorded on a JEOL ECS 300, ECS 400, ECZ 400 or ECA 500 spectrometer at room temperature in  $\text{CDCl}_3$  as a solvent and internal standard ( $^1\text{H}$  NMR:  $\delta = 7.26$  for  $\text{CDCl}_3$ ,  $^{13}\text{C}$  NMR:  $\delta = 77.0$  for  $\text{CDCl}_3$ ) with tetramethylsilane as a further internal standard. IR spectra were recorded by a SHIMADZU IR Affinity-1S spectrophotometer as a thin film on NaCl. High resolution mass spectra were measured on JEOL JMS-3000 (MALDI). UV-Vis spectra were recorded by a SHIMADZU UV-1800 using quartz square cell (OPTIMMA INC. JAPAN; pathlength 10 mm, capacity 0.5 mL).

## 2. Preparation of 5-chloromethyl-furan-2-yl bis(indolyl)methane (5)

To the solution of 5-chloromethyl furfural (**1a**, 28.8 mg, 0.20 mmol) in CH<sub>2</sub>Cl<sub>2</sub> (1 mL) were added MS 4A (10 beads), *N*-methyl indole (**2b**, 50  $\mu$ L, 0.4 mmol, 2 equiv.) and FeCl<sub>3</sub> (1.6 mg, 5 mol%) under Ar. The suspension was stirred at room temperature or under cooling conditions. After substrate **2a** was consumed by TLC monitoring, the mixture was warmed up to room temperature and extracted with CH<sub>2</sub>Cl<sub>2</sub> (10 mL x 3). The organic layers were washed with brine (10 mL), dried over with anhydrous Na<sub>2</sub>SO<sub>4</sub>, and concentrated in vacuo. The yield of 5-chloromethyl-furan-2-yl bis(indolyl)methane (**5**) was determined by <sup>1</sup>H NMR using dibromomethane (14.0  $\mu$ L, 0.20 mmol) as an internal standard (The purification of **5** with silica-gel chromatography was tried, but **5** was decomposed on the silica-gel.).

### <sup>1</sup>H NMR of the crude mixture of 5-chloromethyl-furan-2-yl bis(*N*-methyl-indolyl)methane (**5**) (Table 1, entry 4)

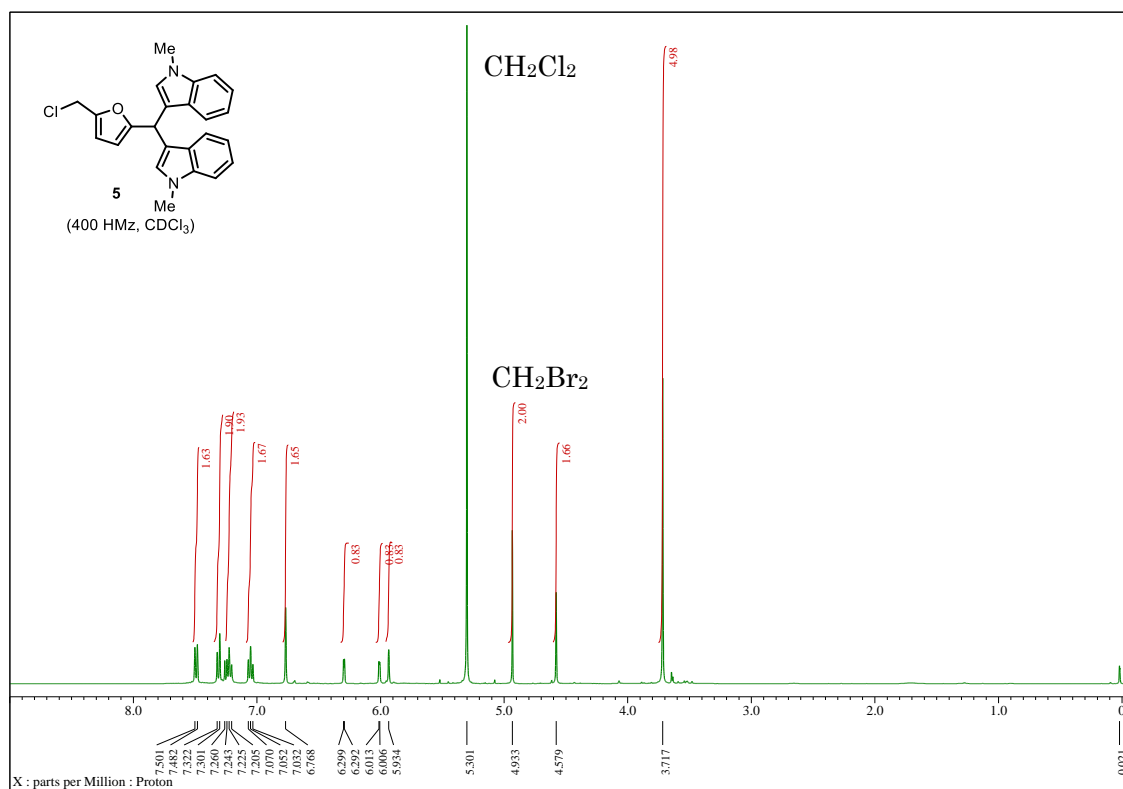

### 3. Preparation and spectroscopic data of 5-aminomethyl furan-2-yl bis(indolyl)methanes (**4**) (Table 2)

#### 3-1. General procedure for synthesis of **4**

To the solution of 5-chloromethyl furfural (**1a**, 28.8 mg, 0.20 mmol) in CH<sub>2</sub>Cl<sub>2</sub> (1 mL) were added MS 4A (10 beads), indole derivative (**2**, 0.4 mmol, 2 equiv.) and FeCl<sub>3</sub> (1.6 mg, 5 mol%). The suspension was stirred at -40 °C under Ar. After 18 h, amine derivative (**3**, 2.0 mmol, 10 equiv.) was added dropwise to the suspension and stirred at -40 °C for 12 h. The mixture was warmed up to room temperature and extracted with EtOAc (10 mL x 3). The organic layers were washed with brine (10 mL), dried over with anhydrous Na<sub>2</sub>SO<sub>4</sub>, and concentrated in vacuo. The residue was purified by silica-gel column chromatography to obtain bis(indolyl)methyl furanyl derivative **4**.

#### 3-2. Spectroscopic data of **4**

##### 5-(*N*-Methyl-*N*-phenyl-aminomethyl)-furan-2-yl bis(indolyl)methane (**4a**)

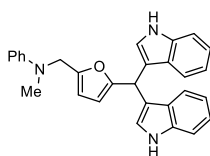

**2a** (46.9 mg, 0.40 mmol, 2 equiv.) and *N*-methylaniline (**3a**, 220  $\mu$ L, 2.0 mmol, 10 equiv.) were used as a substrate according to typical synthetic procedure (3-1) to afford **4a** (35% yield, 30.2 mg, 0.70 mmol) after silica-gel column chromatography (n-hexane / EtOAc = 5/1).

**4a**; wine-red oil; <sup>1</sup>H NMR (500 MHz, CDCl<sub>3</sub>):  $\delta$  7.91 (brs, 2H), 7.46 (d,  $J$  = 7.4 Hz, 2H), 7.35 (d,  $J$  = 7.7 Hz, 2H), 7.22 (t,  $J$  = 7.7 Hz, 2H), 7.16 (t,  $J$  = 7.7 Hz, 2H), 7.01 (t,  $J$  = 8.0 Hz, 2H), 6.80 (d,  $J$  = 8.0 Hz, 2H), 6.76–6.72 (m, 3H), 6.03 (d,  $J$  = 2.9 Hz, 1H), 5.92 (d,  $J$  = 2.9 Hz, 1H), 5.87 (s, 1H), 4.42 (s, 2H), 2.93 (s, 3H). <sup>13</sup>C NMR (125 MHz, CHCl<sub>3</sub>):  $\delta$  156.2, 150.5, 149.3, 136.3, 129.0, 126.7, 123.1, 121.8, 119.6, 119.2, 117.0, 116.9, 113.3, 111.0, 107.9, 107.2, 50.0, 38.4, 34.0.

IR (NaCl) cm<sup>-1</sup>: 3412, 1598, 1544, 1516, 1508, 1490, 1455, 1418, 1363, 1340, 1094, 1012, 909, 784, 744, 693.

HRMS (MALDI)  $m/z$ : 454.1892 (Calcd for C<sub>29</sub>H<sub>25</sub>N<sub>3</sub>ONa [M+Na]<sup>+</sup>: 454.1890).

##### 5-(*N*-Methyl-*N*-phenyl-aminomethyl)-furan-2-yl bis(*N*-methyl-indolyl)methane (**4b**)

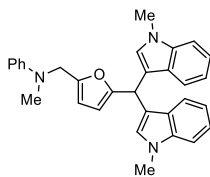

**2b** (50  $\mu$ L, 0.4 mmol, 2 equiv.) and **3a** (220  $\mu$ L, 2.0 mmol, 10 equiv.) were used as a substrate according to typical synthetic procedure (3-1) to afford **4b** (80% yield, 73.4 mg, 0.16 mmol) after

silica-gel column chromatography (n-hexane / EtOAc = 10/1).

**4b**; wine-red oil; <sup>1</sup>H NMR (500 MHz, CDCl<sub>3</sub>): δ 7.50 (d, *J* = 8.0 Hz, 2H), 7.28 (d, *J* = 8.0 Hz, 2H), 7.20 (t, *J* = 8.0 Hz, 2H), 7.04 (m, 5H), 6.70 (s, 2H), 6.55 (d, *J* = 8.6 Hz, 2H), 5.91 (s, 1H), 5.88 (s, 1H), 5.85 (s, 1H), 3.84 (s, 2H), 3.68 (s, 6H), 2.83 (s, 3H). <sup>13</sup>C NMR (125 MHz, CHCl<sub>3</sub>): δ 155.9, 154.1, 147.8, 137.2, 129.5, 127.7, 127.3, 127.3, 121.3, 119.9, 118.6, 115.9, 112.5, 109.0, 107.0, 106.2, 33.9, 33.7, 32.6, 30.9.

IR (NaCl) cm<sup>-1</sup>: 3410, 1927, 1614, 1521, 1472, 1423, 1370, 1328, 1264, 1181, 1153, 1062, 1012, 908, 784, 739.

HRMS (MALDI) *m/z*: 482.2212 (Calcd for C<sub>31</sub>H<sub>29</sub>N<sub>3</sub>ONa [M+Na]<sup>+</sup>: 482.2203).

#### 5-[*N*-Methyl-*N*-(4-methoxy)phenyl-aminomethyl]-furan-2-yl bis(*N*-methyl-indolyl)methane (**4c**)

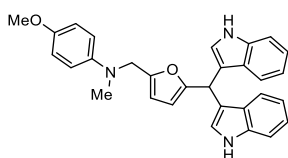

**2a** (46.9 mg, 0.40 mmol, 2 equiv.) and *N*-methyl-4-methoxyaniline (**3b**, 137 mg, 2.0 mmol, 10 equiv.), which was prepared according to the reference [1], were used as a substrate according to typical synthetic procedure (3-1) to afford **4c** (30% yield, 27.8 mg, 0.060 mmol) after silica-gel column chromatography (n-hexane / EtOAc = 3/1).

**4c**; wine-red oil; <sup>1</sup>H NMR (500 MHz, CDCl<sub>3</sub>): δ 7.87 (brs, 2H), 7.46 (d, *J* = 8.0 Hz, 2H), 7.32 (d, *J* = 8.0 Hz, 2H), 7.17 (t, *J* = 7.3 Hz, 2H), 7.03 (t, *J* = 7.3 Hz, 2H), 6.82–6.77 (m, 4H), 6.66 (s, 2H), 6.02 (d, *J* = 2.9 Hz, 1H), 5.92 (d, *J* = 2.9 Hz, 1H), 5.86 (s, 1H), 4.32 (s, 2H), 3.78 (s, 3H), 2.83 (s, 3H). <sup>13</sup>C NMR (125 MHz, CHCl<sub>3</sub>): δ 155.9, 154.2, 147.8, 137.2, 129.5, 127.7, 127.3, 121.3, 119.9, 118.6, 115.9, 112.6, 112.5, 109.0, 107.0, 106.2, 33.9, 33.7, 32.6, 30.9.

IR (NaCl) cm<sup>-1</sup>: 3413, 2833, 1512, 1455, 1421, 1339, 1244, 1181, 1095, 1036, 1014, 909, 819, 784, 742.

HRMS (MALDI) *m/z*: 484.1994 (Calcd for C<sub>30</sub>H<sub>27</sub>N<sub>3</sub>O<sub>2</sub>Na [M+Na]<sup>+</sup>: 484.1995).

#### 5-[*N*-Methyl-*N*-(4-cyano)phenyl-aminomethyl]-furan-2-yl bis(*N*-methyl-indolyl)methane (**4d**)

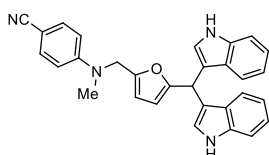

**2a** (46.9 mg, 0.40 mmol, 2 equiv.) and *N*-methyl-4-cyanoaniline (**3c**, 132 mg, 2.0 mmol, 10 equiv.), which was prepared according to the reference [1], were used as a substrate according to typical synthetic procedure (3-1) to afford **4d** (17% yield, 16.6 mg, 0.034 mmol) after silica-gel column

chromatography (n-hexane / EtOAc = 3/1).

**4d**; wine-red oil; <sup>1</sup>H NMR (500 MHz, CDCl<sub>3</sub>): δ 7.94 (brs, 2H), 7.44–7.35 (m, 6H), 7.17 (t, *J* = 8.0 Hz, 2H), 7.01 (t, *J* = 8.0 Hz, 2H), 6.79 (d, *J* = 1.7 Hz, 2H), 6.68 (d, *J* = 9.2 Hz, 2H), 6.07 (d, *J* = 3.8 Hz, 1H), 5.97 (d, *J* = 3.8 Hz, 1H), 5.86 (s, 1H), 4.43 (s, 2H), 2.98 (s, 3H). <sup>13</sup>C NMR (125 MHz, CHCl<sub>3</sub>): δ 156.9, 151.7, 149.1, 136.5, 133.3, 126.7, 122.9, 122.0, 120.6, 119.6, 119.3, 116.9, 112.2, 111.1, 108.3, 107.3, 98.0, 49.2, 38.3, 34.2.

IR (NaCl) cm<sup>-1</sup>: 3408, 2212, 1680, 1607, 1544, 1455, 1423, 1387, 1340, 1177, 1098, 909, 819, 784, 744.

HRMS (MALDI) *m/z*: 455.1867 (Calcd for C<sub>30</sub>H<sub>23</sub>N<sub>4</sub>O [M-H]<sup>+</sup>: 455.1866).

#### 5-(*N*-Pyrrolidinylmethyl)-furan-2-yl bis(*N*-methyl-indolyl)methane (**4e**)

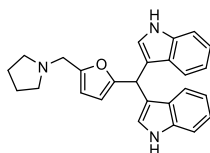

**2a** (46.9 mg, 0.40 mmol, 2 equiv.) and pyrrolidine (**3d**, 160 μL, 10 equiv.) were used as a substrate according to typical synthetic procedure (3-1) to afford **4e** (17% yield, 13.5 mg, 0.034 mmol) after silica-gel column chromatography (CHCl<sub>3</sub> / MeOH = 10/1).

**4e**; brown oil; <sup>1</sup>H NMR (500 MHz, CDCl<sub>3</sub>): δ 8.30 (brs, 2H), 7.44 (d, *J* = 7.4 Hz, 2H), 7.25 (d, *J* = 7.4 Hz, 2H), 7.13 (t, *J* = 7.4 Hz, 2H), 7.01 (t, *J* = 7.4 Hz, 2H), 6.59 (s, 2H), 6.12 (d, *J* = 2.9 Hz, 1H), 5.97 (d, *J* = 2.9 Hz, 1H), 5.84 (s, 1H), 3.64 (s, 2H), 2.57 (s, 4H), 1.71 (s, 4H). <sup>13</sup>C NMR (125 MHz, CHCl<sub>3</sub>): δ 156.9, 150.0, 136.4, 126.7, 123.4, 121.5, 119.4, 118.9, 116.7, 111.1, 109.4, 107.0, 53.2, 51.6, 34.0, 23.4.

IR (NaCl) cm<sup>-1</sup>: 3412, 3057, 2963, 2925, 2895, 2810, 1618, 1455, 1419, 1340, 1244, 1215, 1125, 1095, 908, 785, 739.

HRMS (MALDI) *m/z*: 394.1918 (Calcd for C<sub>26</sub>H<sub>24</sub>N<sub>3</sub>O [M-H]<sup>+</sup>: 394.1914).

## 4. Optimization to synthesize **4a**

### 4-1. Effect of solvent

To the solution of 5-chloromethyl furfural (**1a**, 28.8 mg, 0.20 mmol) in solvent (1 mL) were added MS 4A (10 beads), indole (**2a**, 46.9 mg, 0.4 mmol, 2 equiv.) and FeCl<sub>3</sub> (1.6 mg, 5 mol%, 0.01 mmol) under Ar. The suspension was stirred at room temperature or under cooling condition. After substrate **2a** disappeared by TLC monitoring, *N*-methyl aniline (**3a**, 220 μL, 2.0 mmol, 10 equiv.) was added dropwise to the suspension and stirred at the same temperature for 12 h. The mixture was warmed up to room temperature and extracted with EtOAc (10 mL x 3). The organic layers were washed with

brine (10 mL), dried over with anhydrous Na<sub>2</sub>SO<sub>4</sub>, and concentrated in vacuo. The yield of **4a** was determined by <sup>1</sup>H NMR using 1,1,2,2-tetrachloroethane (21.0 μL, 0.20 mmol).

**Table S1. Screening of solvent**

| entry           | solvent                           | condition                    | yield (%) |
|-----------------|-----------------------------------|------------------------------|-----------|
| 1               | CH <sub>2</sub> Cl <sub>2</sub>   | -40 °C, 4 h                  | 35        |
| 2               | CH <sub>2</sub> Cl <sub>2</sub>   | -40 °C, 10 h                 | 40        |
| 3               | CH <sub>2</sub> Cl <sub>2</sub>   | -60 °C (4 h) to -40 °C (6 h) | 41        |
| 4 <sup>a)</sup> | CH <sub>2</sub> Cl <sub>2</sub>   | -60 °C, 10 h                 | 32        |
| 5               | CHCl <sub>3</sub>                 | -60 °C, 10 h                 | 19        |
| 6               | (CH <sub>2</sub> Cl) <sub>2</sub> | -40 °C, 6 h                  | 48        |
| 7               | PhCl                              | -40 °C, 6 h                  | 26        |
| 8               | (CH <sub>2</sub> Cl) <sub>2</sub> | -40 °C, 6 h                  | 37        |
| 9               | MeCN                              | rt, 6 h                      | 26        |
| 10              | THF                               | rt, 6 h                      | 26        |

<sup>a</sup>0.1 M

#### 4-2. Effect of acid catalyst

To the solution of **1a** (28.8 mg, 0.20 mmol) in (CH<sub>2</sub>Cl)<sub>2</sub> (1 mL) were added MS 4A (10 beads), **2a** (46.9 mg, 0.4 mmol, 2 equiv.) and acid catalyst (5 mol%, 0.01 mmol) under Ar. The suspension was stirred at room temperature or under cooling condition. After substrate **2a** disappeared by TLC monitoring, *N*-methyl aniline (**3a**, 220 μL, 2.0 mmol, 10 equiv.) was added dropwise to the suspension and stirred at the same temperature for 12 h. The mixture was warmed up to room temperature and extracted with EtOAc (10 mL x 3). The organic layers were washed with brine (10 mL), dried over with anhydrous Na<sub>2</sub>SO<sub>4</sub>, and concentrated in vacuo. The yield of **4a** was determined by <sup>1</sup>H NMR using 1,1,2,2-tetrachloroethane (21.0 μL, 0.20 mmol).



**Table S2. Screening of acid catalyst**

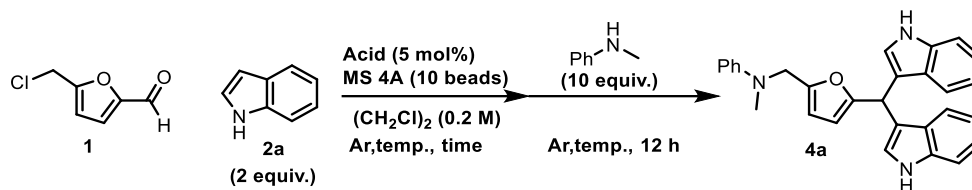

| entry            | acid                                 | condition    | yield (%) |
|------------------|--------------------------------------|--------------|-----------|
| 1                | FeCl <sub>3</sub>                    | -40 °C, 6 h  | 48        |
| 2 <sup>a)</sup>  | TFA                                  | -40 °C, 24 h | 30        |
| 3                | OP(OPh) <sub>2</sub> OH              | -40 °C, 12 h | 51        |
| 4                | InCl <sub>3</sub>                    | -40 °C, 12 h | 18        |
| 5                | IrCl <sub>3</sub>                    | -40 °C, 12 h | 25        |
| 6                | Zn(OTf) <sub>2</sub>                 | -40 °C, 4 h  | 23        |
| 7                | Sn(OTf) <sub>2</sub>                 | -40 °C, 6 h  | 48        |
| 8                | Y(OTf) <sub>2</sub>                  | -40 °C, 12 h | 16        |
| 9                | Yb(OTf) <sub>2</sub>                 | -40 °C, 12 h | 55        |
| 10               | CeCl <sub>3</sub> ·7H <sub>2</sub> O | -40 °C, 4 h  | 53        |
| 11               | Sc(OTf) <sub>3</sub>                 | -40 °C, 12 h | 37        |
| 12               | MoOCl <sub>4</sub>                   | -40 °C, 18 h | 51        |
| 13 <sup>b)</sup> | montmorillonite K10                  | -40 °C, 18 h | 55        |
| 14               | AMBERLITE IR 120B Na                 | -40 °C, 18 h | 48        |

<sup>a</sup>10 mol% was used. <sup>b</sup>10 mg was used.

#### 4-3. Effect of drying reagent

To the solution of 5-chloromethyl furfural (**1a**, 28.8 mg, 0.20 mmol) in CH<sub>2</sub>Cl<sub>2</sub> (1 mL) were added drying reagent (100 mg), *N*-methyl indole (**2b**, 50 μL, 0.4 mmol, 2 equiv.) and FeCl<sub>3</sub> (1.6 mg, 5 mol%) under Ar. The suspension was stirred at -40 °C. After 4 h, the mixture was warmed up to room temperature and extracted with CH<sub>2</sub>Cl<sub>2</sub> (10 mL x 3). The organic layers were washed with brine (10 mL), dried over with anhydrous Na<sub>2</sub>SO<sub>4</sub>, and concentrated in vacuo. The yield of 5-chloromethyl-furan-2-yl bis(indolyl)methane (**5**) was determined by <sup>1</sup>H NMR using dibromomethane (14.0 μL, 0.20 mmol) as an internal standard.

**Table S3. Screening of drying reagent**

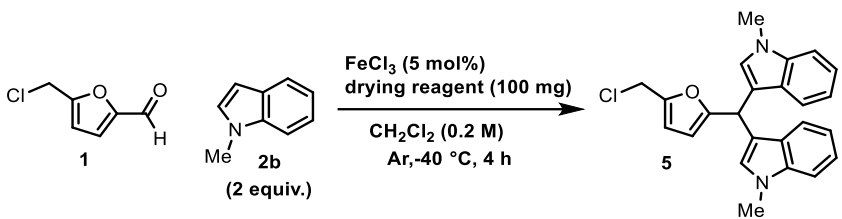

| entry           | drying reagent                  | yield (%) |          |
|-----------------|---------------------------------|-----------|----------|
|                 |                                 | <b>1</b>  | <b>5</b> |
| 1 <sup>a)</sup> | MS 4A                           | 1         | 83       |
| 2               | Na <sub>2</sub> SO <sub>4</sub> | 7         | 80       |
| 3               | MgSO <sub>4</sub>               | 0         | 86       |
| 4               | activated alumina (neutral)     | 6         | 33       |

<sup>a</sup>10 beads were used.

**One-pot synthesis of 4b using MgSO<sub>4</sub> as drying reagent;** To the solution of 5-chloromethyl furfural (**1a**, 28.8 mg, 0.20 mmol) in CH<sub>2</sub>Cl<sub>2</sub> (1 mL) were added MgSO<sub>4</sub> (100 mg), *N*-methyl indole (**2b**, 50 μL, 0.4 mmol, 2 equiv.) and FeCl<sub>3</sub> (1.6 mg, 5 mol%). The suspension was stirred at -40 °C under Ar. After 18 h, *N*-methyl amine (**3a**, 2.0 mmol, 10 equiv.) was added dropwise to the suspension and stirred at -40 °C for 12 h. The mixture was warmed up to room temperature and extracted with EtOAc (10 mL x 3). The organic layers were washed with brine (10 mL), dried over with anhydrous Na<sub>2</sub>SO<sub>4</sub>, and concentrated in vacuo. The yield of **4b** (67% yield) was determined by <sup>1</sup>H NMR using 1,1,2,2-tetrachloroethane (21 μL, 0.20 mmol) as an internal standard. Yield of **4b** was lower in comparison with the reaction using MS 4A. shown Table 2, entry 1.

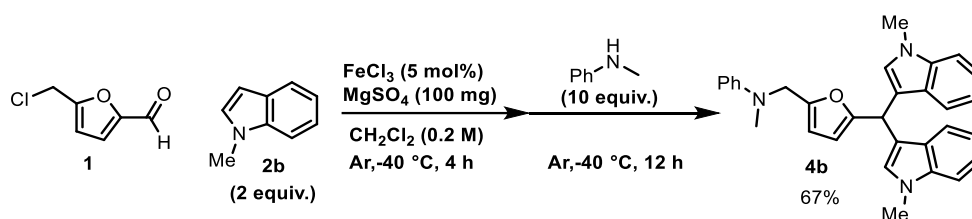

## 5. Procedure of analysis of chromogenic properties (Figures 3, 4, and 5)

### 5-1. Preparation of the stock solutions of BIM or metal ion

The concentrations of stock solutions were referred to the reference [2].

**Stock solutions** (1.0 x10<sup>-4</sup> M) of BIM (**4a–4e**, and **6a–6e**); BIM (0.010 mmol) was dissolved in MeCN/distilled water (7/3; 1 mL). This solution (100 μL) was further dissolved in MeCN/distilled water (7/3; 10 mL). **4a** (4.3 mg), **4b** (4.6 mg), **4c** (4.6 mg), **4d** (4.6 mg), **4e** (4.0 mg), **6a** (3.1 mg), **6b**

(3.4 mg), **6c** (3.2 mg), **6d** (3.2 mg), **6e** (2.5 mg) were used, respectively.

**Stock solutions** ( $4.0 \times 10^{-4}$  M) **of metal ion**; Metal salts (0.040 mmol) were dissolved in MeCN/distilled water (7/3) (1 mL). The solution (100  $\mu$ L) was dissolved in MeCN/distilled water (7/3) (10 mL). PdCl<sub>2</sub> (7.1 mg), CuCl<sub>2</sub> (5.4 mg), FeCl<sub>2</sub> (5.1 mg), FeCl<sub>3</sub> (6.5mg), CrCl<sub>2</sub> (4.9 mg), CrCl<sub>3</sub> (6.3mg), NiCl<sub>2</sub> (5.2 mg), ZnCl<sub>2</sub> (5.5 mg), InCl<sub>3</sub> (8.8 mg), PtCl<sub>2</sub> (10.6mg), CeCl<sub>3</sub> (9.9 mg) were used, respectively.

## 5-2. Effect of mixture ratio of BIM 4a and metal ion

**Stock solutions** ( $1.0 \times 10^{-4}$  M) **of Pd<sup>2+</sup> ion**; PdCl<sub>2</sub> (1.8 mg, 0.010 mmol) was dissolved in MeCN/distilled water (7/3) (1 mL). The solution (100  $\mu$ L) was dissolved in MeCN/distilled water (7/3) (9 mL).

**Stock solutions** ( $4.0 \times 10^{-3}$  M) **of Pd<sup>2+</sup> ion**; PdCl<sub>2</sub> (7.1 mg, 0.040 mmol) was dissolved in MeCN/distilled water (7/3) (10 mL).

To the stock solution of BIM (0.25 mL) in a sample tube, each stock solution of Pd<sup>2+</sup> ion (0.25 mL) was added. After 1 h, the color of the mixture was checked.

The color change in the mixture (**4a**/Pd<sup>2+</sup> = 1/1) was subtle, and the color change in the mixture (**4a**/Pd<sup>2+</sup> = 1/40) was comparable to the mixture (**4a**/Pd<sup>2+</sup> = 1/4). Therefore, a mixing ratio of **4a**/Pd<sup>2+</sup> = 1/4 was applied to further study.

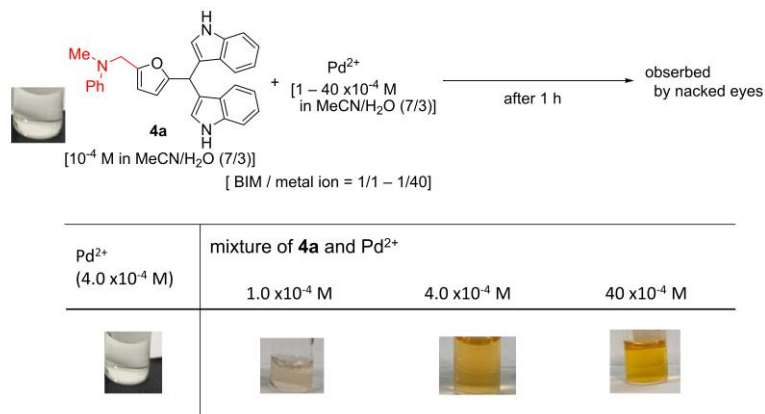

**Figure S1. Screening of the mixing ratio of 4a and Pd<sup>2+</sup>**

## 5-3. Procedure for UV-Vis analysis (Figures 3 and 4)

To the stock solution of BIM (0.25 mL) in a sample tube, the stock solution of metal ion (0.25 mL) was added, and the color of the mixture was checked. After 1 h, UV-Vis absorption of the mixture poured to the quartz square cell from the sample tube, was measured

## 5-4. Time course study of UV-Vis absorption of the mixture of 4a and Pd<sup>2+</sup> ion

**Background data of 4a (black dash line) or Pd<sup>2+</sup> ion (gray dash line)**; The stock solution of **4a**

(0.5 mL) was poured to the quartz square cells, and UV-Vis absorption was measured from 190 to 700 nm. Independently, the stock solution of Pd<sup>2+</sup> ion was poured to the quartz square cells, and UV-Vis absorption was measured.

**Mixing of 4a and Pd<sup>2+</sup> ion;** To the stock solution of **4a** (0.25 mL) in the quartz square cells, the stock solution of Pd<sup>2+</sup> ion (0.25 mL) was added. UV-Vis absorption of the mixture was measured [2 min. (black), 5 min. (gray), 10 min. (purple), 15 min. (blue), 30 min. (green), 45 min. (orange), 60 min. (red) after mixed].

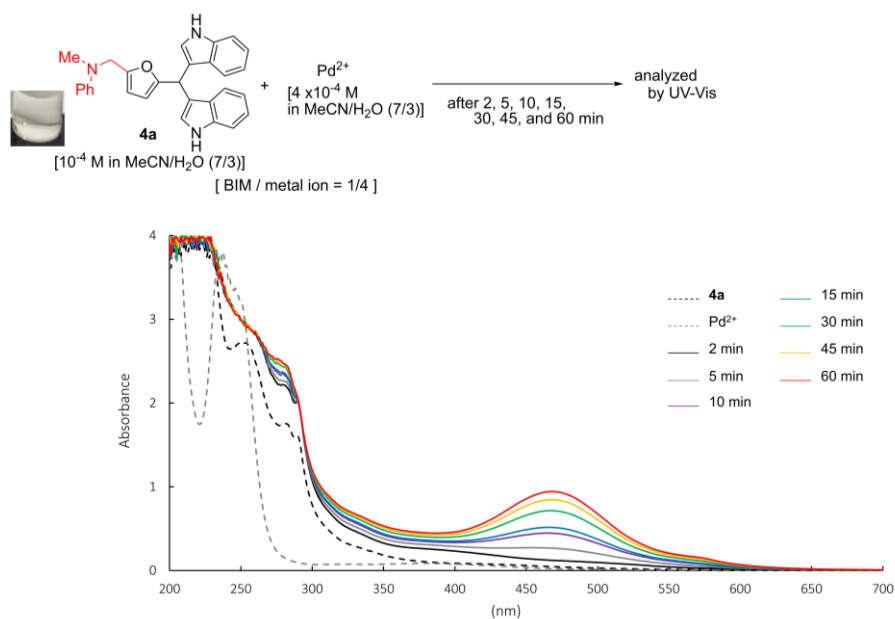

**Figure S2. Time course study of UV-Vis absorption of the mixture of 4a and Pd<sup>2+</sup>**

### 5-5. Effect of concentration of Pd<sup>2+</sup> salt solution

**Stock solutions (4.0 x 10<sup>-5</sup> M) of Pd<sup>2+</sup> ion;** The stock solution (4.0 x 10<sup>-4</sup> M, 1 mL) was dissolved in MeCN/distilled water (7/3) (9 mL).

**Mixing of 4a and Pd<sup>2+</sup> ion;** To the stock solution of 4a (0.25 mL) in the quartz square cells, the stock solution of Pd<sup>2+</sup> ion (0.25 mL) was added. After 1 h, UV-Vis absorption of the mixture was measured. [The concentration of PdCl<sub>2</sub> solution (MeCN/distilled water (7/3)) ; 4 x 10<sup>-4</sup> M (red), 1 x 10<sup>-4</sup> M (blue), 4 x 10<sup>-5</sup> M (gray)]

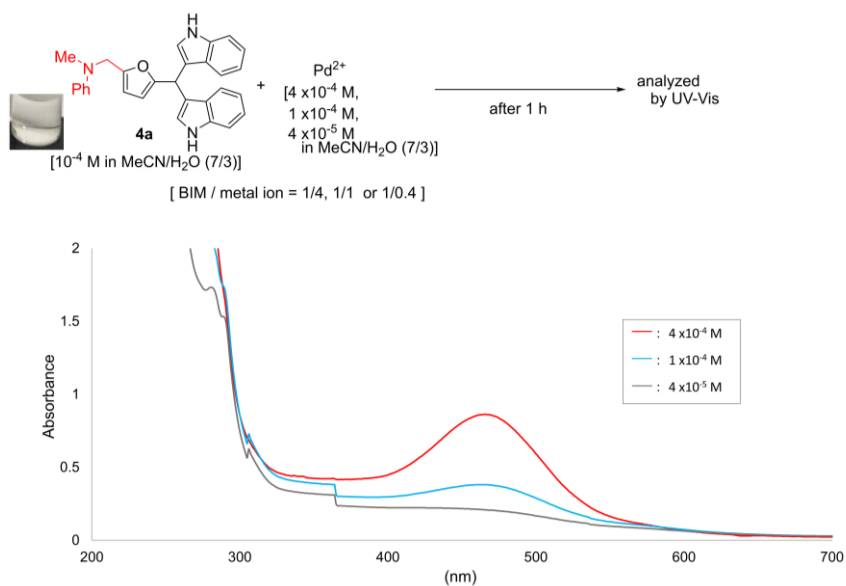

**Figure S3. Effect of concentration of PdCl<sub>2</sub> solution**

## 6. Chromogenic property of 5-amine unit-substituted furan-2-yl BIM derivatives (4a-e)

To the stock solution of **4** (0.25 mL) in a sample tube, the stock solution of Pd<sup>2+</sup> ion (0.25 mL) was added. After 1 h, the color of the mixture was checked.

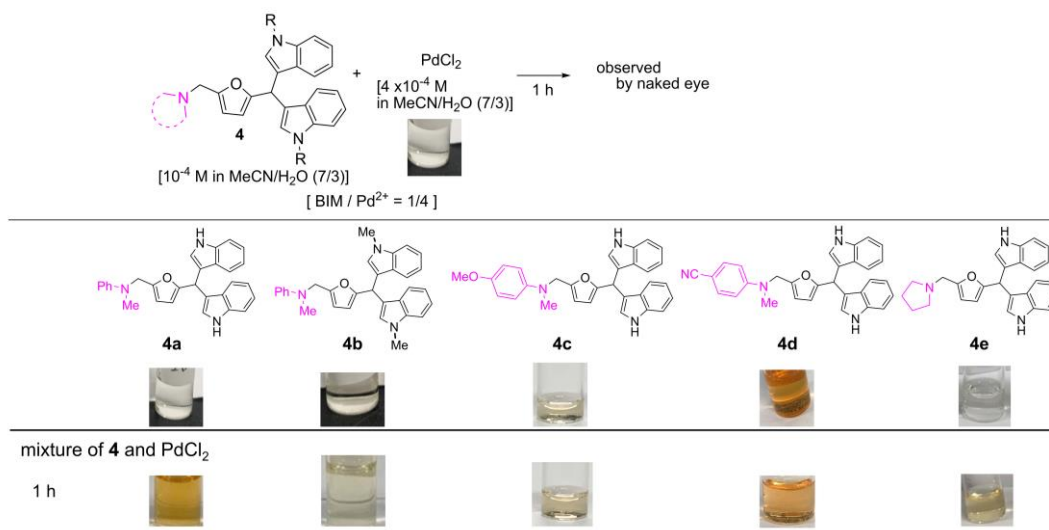

Figure S4. Chromogenic property of the mixture of **4** and Pd<sup>2+</sup>

## 7. Preparation and spectroscopic data of bis(indolyl)methyl compounds (6)

### Furan-2-yl bis(indolyl)methane (**6a**)

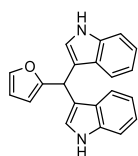

Furan-2-yl bis(indolyl)methane (**6a**) was prepared according to the reference [3]. The suspension of furfural (50 mg, 0.50 mmol) and **2a** (117 mg, 1.0 mmol, 2.0 equiv.) in CH<sub>2</sub>Cl<sub>2</sub> (2 mL) was added amberlyst-15 (50 mg), and stirred at room temperature under Ar atmosphere. After 6 h, the suspension was filtrated and the filtrate was concentrated. The residue was purified by silica-gel column chromatography (Hex/EtOAc = 3/1) to obtain **6a** (72% yield, 119 mg, 0.38 mmol).

**6a**; wine-red oil; <sup>1</sup>H NMR (500 MHz, CDCl<sub>3</sub>): δ 7.97 (s, 2H), 7.48 (d, *J* = 8.0 Hz, 2H), 7.37–7.36 (m, 3H), 7.19–7.16 (m, 2H), 7.06–7.03 (m, 2H), 6.88 (d, *J* = 1.7 Hz, 2H), 6.30 (dd, *J* = 2.7, 1.5 Hz, 1H), 6.06 (d, *J* = 2.7 Hz, 1H), 5.95 (s, 1H). <sup>13</sup>C NMR (125 MHz, CHCl<sub>3</sub>): δ 157.0, 141.2, 136.4, 126.7, 123.0, 121.9, 119.6, 119.3, 117.0, 111.1, 110.1, 106.6, 34.0.

<sup>1</sup>H and <sup>13</sup>C NMR spectra of **6a** was identical to that of the reference [4].

### 5-Hydroxymethyl-furan-2-yl bis(indolyl)methane (**6b**)

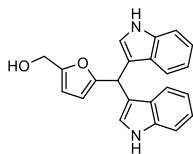

To the solution of 5-hydroxymethyl furfural (25.2 mg, 0.20 mmol) in CH<sub>2</sub>Cl<sub>2</sub> (1 mL) were added **2a** (46.9 mg, 0.4 mmol, 2 equiv.) and FeCl<sub>3</sub> (1.6 mg, 5 mol%). The solution was stirred at 0 °C under Ar. After 2 h, the mixture was warmed up to room temperature and extracted with EtOAc (10 mL x 3). The organic layers were washed with brine (10 mL), dried over with anhydrous Na<sub>2</sub>SO<sub>4</sub>, and concentrated in vacuo. To the residue were added MeOH (1 mL) and NaBH<sub>4</sub> (1.9 mg, 0.05 mmol) to reduce the unreacted 5-hydroxymethyl furfural since 5-hydroxymethyl furfural and **6b** could not be separated by silica-gel chromatography, and the solution was stirred at 0 °C under Ar atmosphere. After 30 min, the mixture was quenched with water, and extracted with EtOAc (10 mL x3). The organic layers were washed with brine (10 mL), dried over with anhydrous Na<sub>2</sub>SO<sub>4</sub>, and concentrated in vacuo. The residue was purified by silica-gel column chromatography (Hex/EtOAc = 2/1) to obtain **6b** (44% yield, 30.2 mg, 0.057 mmol).

**6b**; wine-red oil; <sup>1</sup>H NMR (500 MHz, CDCl<sub>3</sub>): δ 7.83 (brs, 2H), 7.46 (d, *J* = 7.6 Hz, 2H), 7.25 (d, *J* = 7.6 Hz, 2H), 7.15 (t, *J* = 7.6 Hz, 2H), 7.03 (t, *J* = 7.6 Hz, 2H), 6.67 (s, 2H), 6.14 (s, 1H), 5.97 (s, 1H), 5.87 (s, 1H), 4.40 (s, 2H). <sup>13</sup>C NMR (125 MHz, CHCl<sub>3</sub>): δ 157.2, 152.5, 136.4, 126.6, 123.3, 121.8, 119.5, 119.2, 116.6, 111.2, 108.6, 107.3, 57.4, 34.1

<sup>1</sup>H and <sup>13</sup>C NMR spectrum of **6b** was identical to that of the reference [5].

### Phenyl bis(indolyl)methane (**6c**)

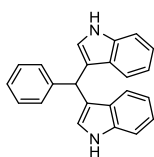

Phenyl bis(indolyl)methane (**6c**) was prepared according to the reference [3]. The suspension of furfural (50 mg, 0.50 mmol) and **2a** (117 mg, 1.0 mmol, 2.0 equiv.) in CH<sub>2</sub>Cl<sub>2</sub> (2 mL) was added amberlyst-15 (50 mg), and stirred at room temperature under Ar atmosphere. After 6 h, the suspension was filtrated and the filtrate was concentrated. The residue was purified by silica-gel column chromatography (Hex/EtOAc = 3/1) to obtain **6c** (64% yield, 102 mg, 0.32 mmol).

**6c**; brown oil; <sup>1</sup>H NMR (500 MHz, CDCl<sub>3</sub>): δ 7.89 (brs, 2H), 7.40 (d, *J* = 8.0 Hz, 2H), 7.37–7.35 (m, 4H), 7.29 (t, *J* = 7.7 Hz, 2H), 7.22 (t, *J* = 7.0 Hz, 1H), 7.18 (t, *J* = 7.0 Hz, 2H), 7.01 (t, *J* = 7.4 Hz, 2H), 6.65 (s, 2H), 5.89 (s, 1H). <sup>13</sup>C NMR (125 MHz, CHCl<sub>3</sub>): δ 143.9, 136.6, 128.7, 128.2, 127.0, 126.1, 123.6, 121.9, 119.9, 119.7, 119.2, 111.0, 40.1.

$^1\text{H}$  and  $^{13}\text{C}$  NMR spectrum of **6c** was identical to that of the reference [4].

### 1,1-Bis(indolyl)hexane (**6d**)

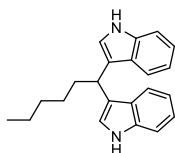

To the solution of hexanal (20.0 mg, 0.20 mmol) in  $(\text{CH}_2\text{Cl})_2$  (1 mL) were added indole (46.9 mg, 0.4 mmol, 2 equiv.) and  $\text{FeCl}_3$  (1.6 mg, 5 mol%). The solution was stirred at rt under Ar. After 6 h, the mixture was extracted with EtOAc (10 mL x 3). The organic layers were washed with brine (10 mL), dried over with anhydrous  $\text{Na}_2\text{SO}_4$ , and concentrated in vacuo. The residue was purified by silica-gel column chromatography (Hex/EtOAc = 3/1) to obtain **6d** (73% yield, 46.2 mg, 0.146 mmol).

**6d**; wine-red oil;  $^1\text{H}$  NMR (500 MHz,  $\text{CDCl}_3$ ):  $\delta$  7.69–7.67 (m, 4H), 7.31 (d,  $J = 8.2$  Hz, 2H), 7.23–7.20 (m, 2H), 7.14–7.10 (m, 2H), 6.91 (d,  $J = 2.3$  Hz, 2H), 4.53 (t,  $J = 7.3$  Hz, 1H), 2.27 (q,  $J = 7.3$  Hz, 2H), 1.52–1.30 (m, 6H), 0.93 (t,  $J = 7.3$  Hz, 3H).  $^{13}\text{C}$  NMR (125 MHz,  $\text{CHCl}_3$ ):  $\delta$  136.4, 127.1, 121.6, 121.4, 120.4, 119.6, 118.9, 111.0, 35.8, 33.9, 32.0, 28.0, 22.6, 14.1.

$^1\text{H}$  and  $^{13}\text{C}$  NMR spectrum of **6d** was identical to that of the reference [6].

### Diindolylmethane (**6e**)

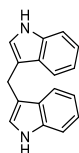

Diindolylmethane (**6e**) was prepared according to the reference [7]. To the solution of indole-2-nal (29.0 mg, 0.20 mmol) in  $(\text{CH}_2\text{Cl})_2$  (2 mL) were added indole (70.4 mg, 0.60 mmol, 3 equiv.), AcOH (29  $\mu\text{L}$ , 2.5 mmol, 5 equiv.) and  $\text{NaBH}_4$  (11.5 mg, 0.30 mmol, 1.5 equiv.). The mixture was heated to reflux under Ar. After 6 h, the mixture was cooled to room temperature, quenched with saturated sodium bicarbonate (4 mL), and extracted with EtOAc (10 mL x 3). The organic layers were washed with brine (10 mL), dried over with anhydrous  $\text{Na}_2\text{SO}_4$ , and concentrated in vacuo. The residue was purified by silica-gel column chromatography (Hex/EtOAc = 10/1) to obtain **6e** (60% yield, 29.5 mg, 0.12 mmol).

**6e**; brown oil;  $^1\text{H}$  NMR (500 MHz,  $\text{CDCl}_3$ ):  $\delta$  7.90 (brs, 2H), 7.63 (d,  $J = 8.0$  Hz, 2H), 7.36 (d,  $J = 8.0$  Hz, 2H), 7.19 (t,  $J = 8.0$  Hz, 2H), 7.09 (t,  $J = 8.0$  Hz, 2H), 6.95 (s, 2H), 4.25 (s, 2H).  $^{13}\text{C}$  NMR (125 MHz,  $\text{CHCl}_3$ ):  $\delta$  136.5, 127.6, 122.2, 121.9, 119.2, 119.2, 115.7, 111.0, 21.2.

$^1\text{H}$  and  $^{13}\text{C}$  NMR spectrum of **6e** was identical to that of the reference [7].



## 8. UV-Vis absorbance property of 6a

To the stock solution of **6a** (0.25 mL) in a sample tube, the stock solution of the metal ion (0.25 mL) was added. After 1 h, UV-Vis absorption of the mixture poured to the quartz square cell from the sample tube was measured.

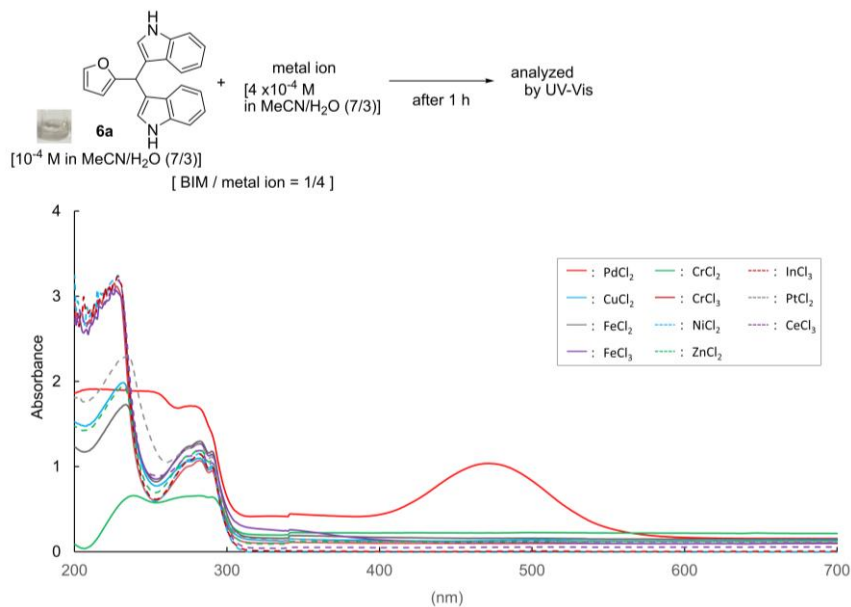

Figure S5. Chromogenic property of the mixture of **6a** and metal ions

## 9. UV-Vis absorbance property of 4b

To the stock solution of **4b** (0.25 mL) in a sample tube, the stock solution of the metal ion (0.25 mL) was added. After 1 h, UV-Vis absorption of the mixture poured to the quartz square cell from the sample tube was measured.

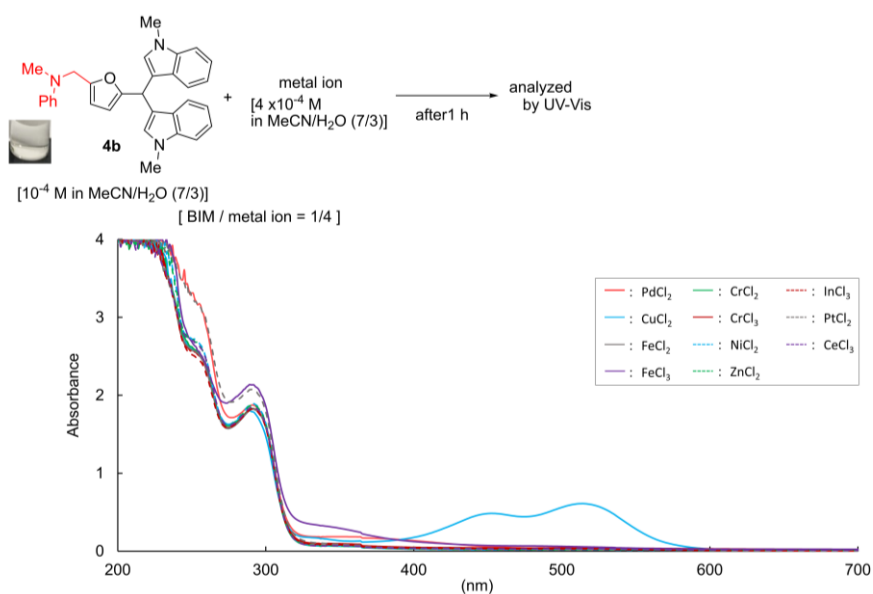

Figure S6. Chromogenic property of the mixture of **4b** and metal ions

## 10. References

- [1] Y. Zhang, H. Zhang, K. Gao, *Org. Lett.* 2021, **23**, 8282-8286.
- [2] R. M. F. Batista, S. P. G. Costa, R. M. P. Silva, N. E. M. Lima and M. M. M. Raposo, *Dyes Pigm.*, 2014, **102**, 293-300.
- [3] C. Ramesh, J. Banerjee, R. Pal, B. Das, *Adv. Synth. Catal.* 2003, **345**, 557-559.
- [4] Z. M. Salem, J. Saway, J. J. Badillo, *Org. Lett.* 2019, **21**, 8528-8532.
- [5] H. B. Phan, C. M. Luong, L. P. Nguyen, B. T. Bui, H. T. Nguyen, B. V. Mai, T. V.-T. Mai, L. K. Huynh and P. H. Tran, *ACS Sustainable Chem. Eng.*, 2022, **10**, 8673-8684.
- [6] S. Rinkam, W. Senapak, S. Watchasit, R. Saeeng, U. Sirion, *Synlett*, 2022, **33**, 1383-1390.
- [7] H. Zhou, Z. Huang, H. Huang, C. Song, J. Chang, *Tetrahedron*, 2021, **94**, 132338.

## 11. <sup>1</sup>H NMR and <sup>13</sup>C NMR spectra of products.

### <sup>1</sup>H NMR of 5-(*N*-methyl-*N*-phenyl-aminomethyl)-furan-2-yl bis(indolyl)methane (4a)

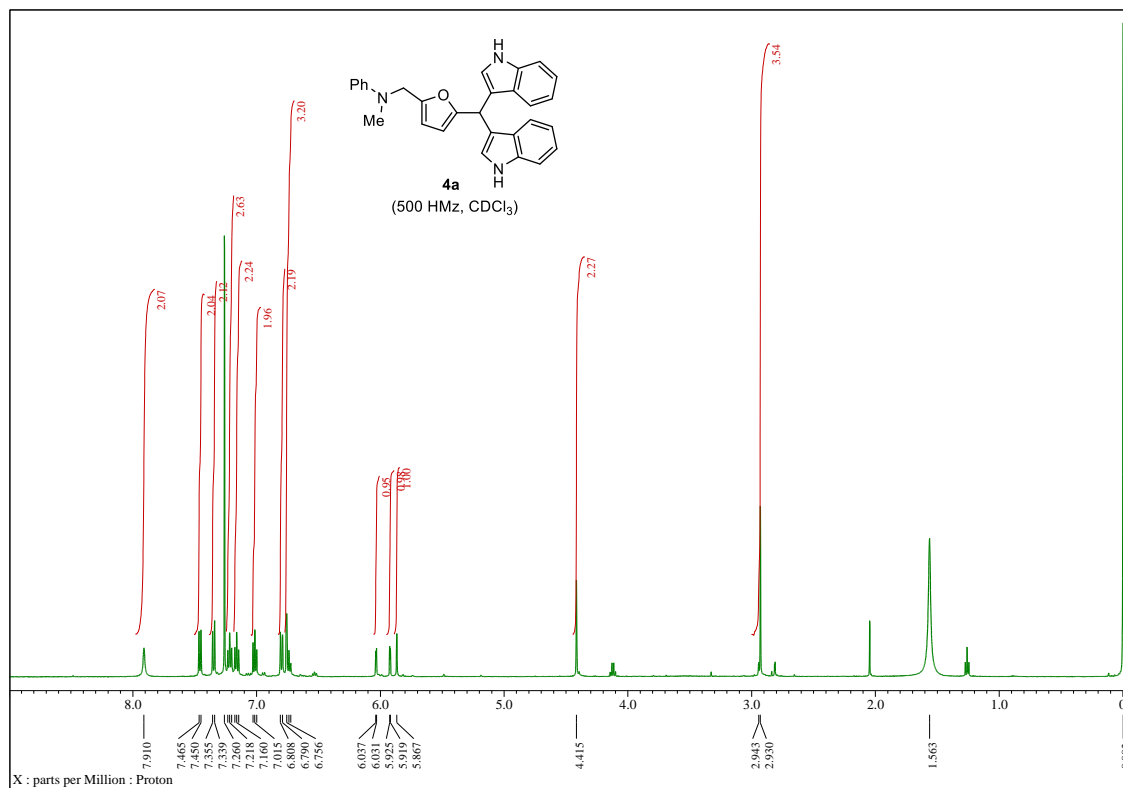

### <sup>13</sup>C NMR of 5-(*N*-methyl-*N*-phenyl-aminomethyl)-furan-2-yl bis(indolyl)methane (4a)

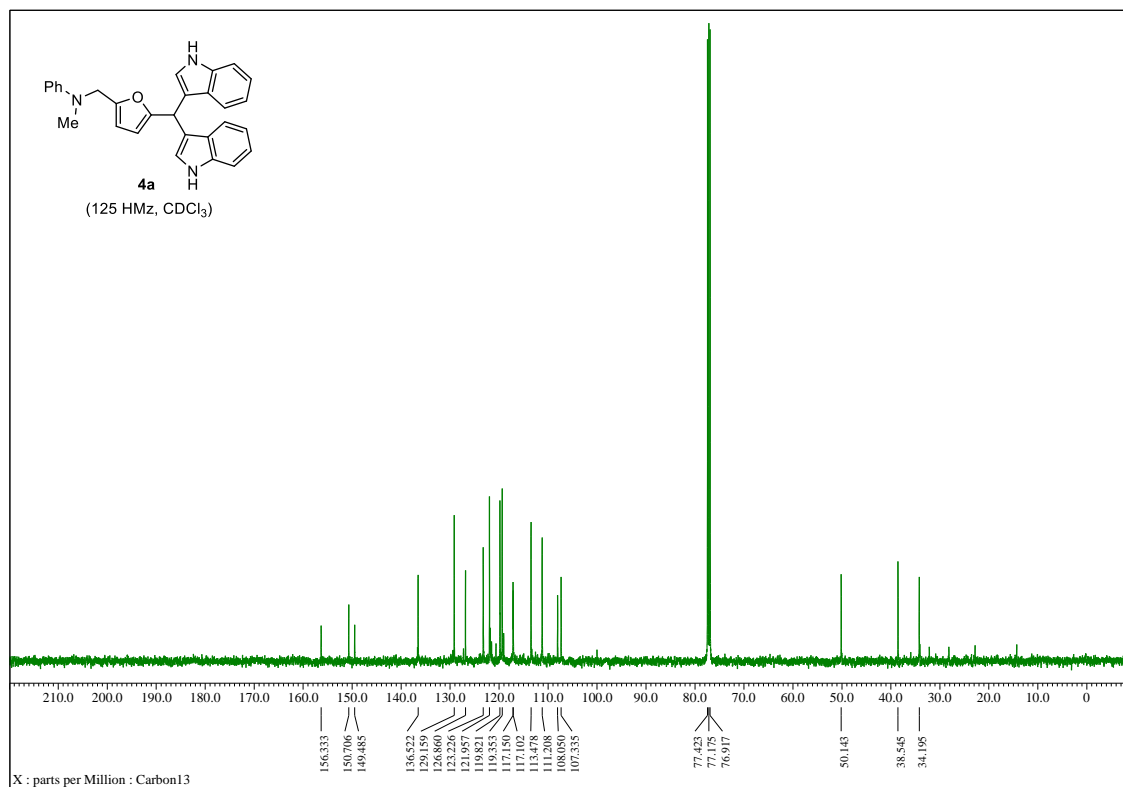

**<sup>1</sup>H NMR of 5-(*N*-methyl-*N*-phenyl-aminomethyl)-furan-2-yl bis(*N*-methyl-indolyl)methane (4b)**

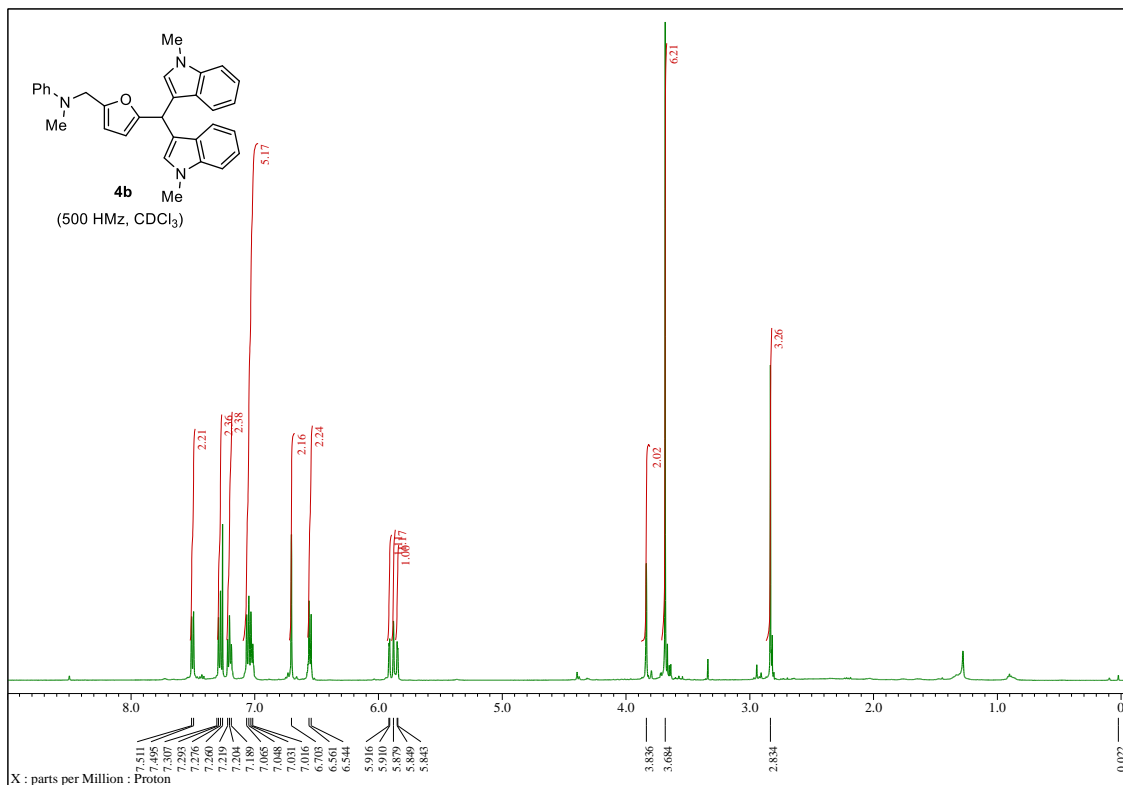

**<sup>13</sup>C NMR of 5-(*N*-methyl-*N*-phenyl-aminomethyl)-furan-2-yl bis(*N*-methyl-indolyl)methane (4b)**

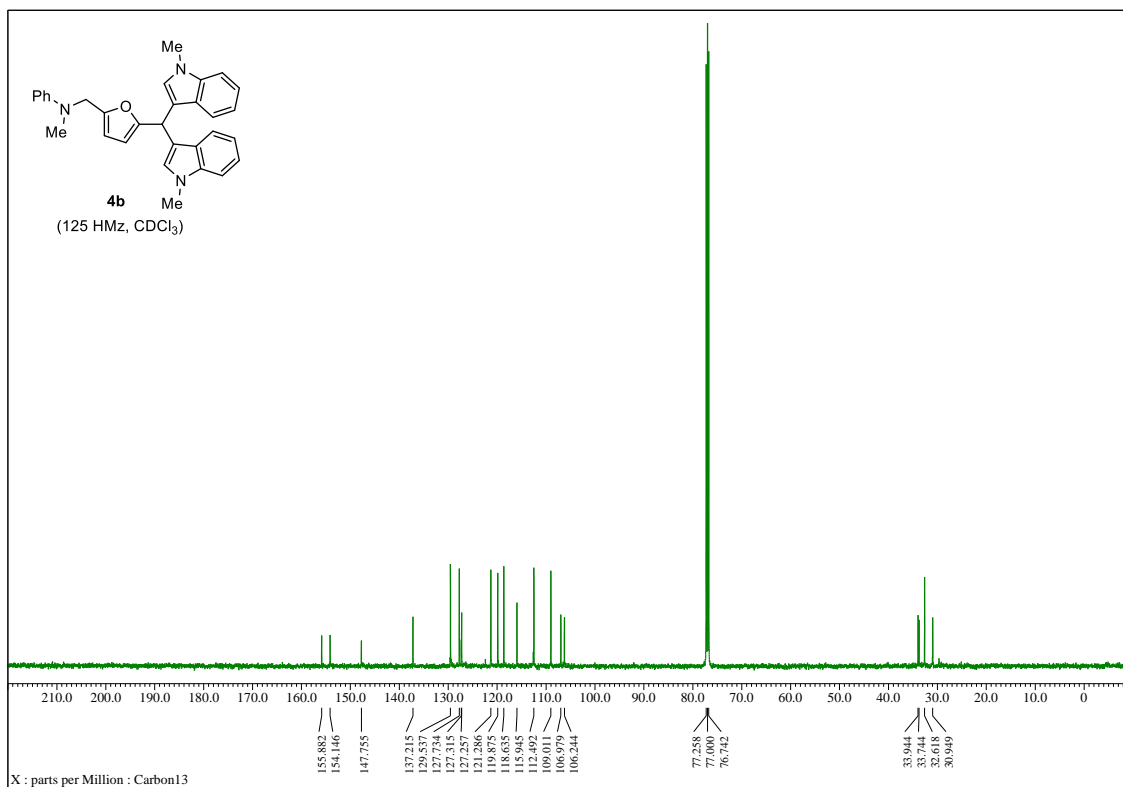

**<sup>1</sup>H NMR of 5-[N-methyl-N-(4-methoxy)phenyl-aminomethyl]-furan-2-yl bis(N-methyl-indolyl)methane (4c)**

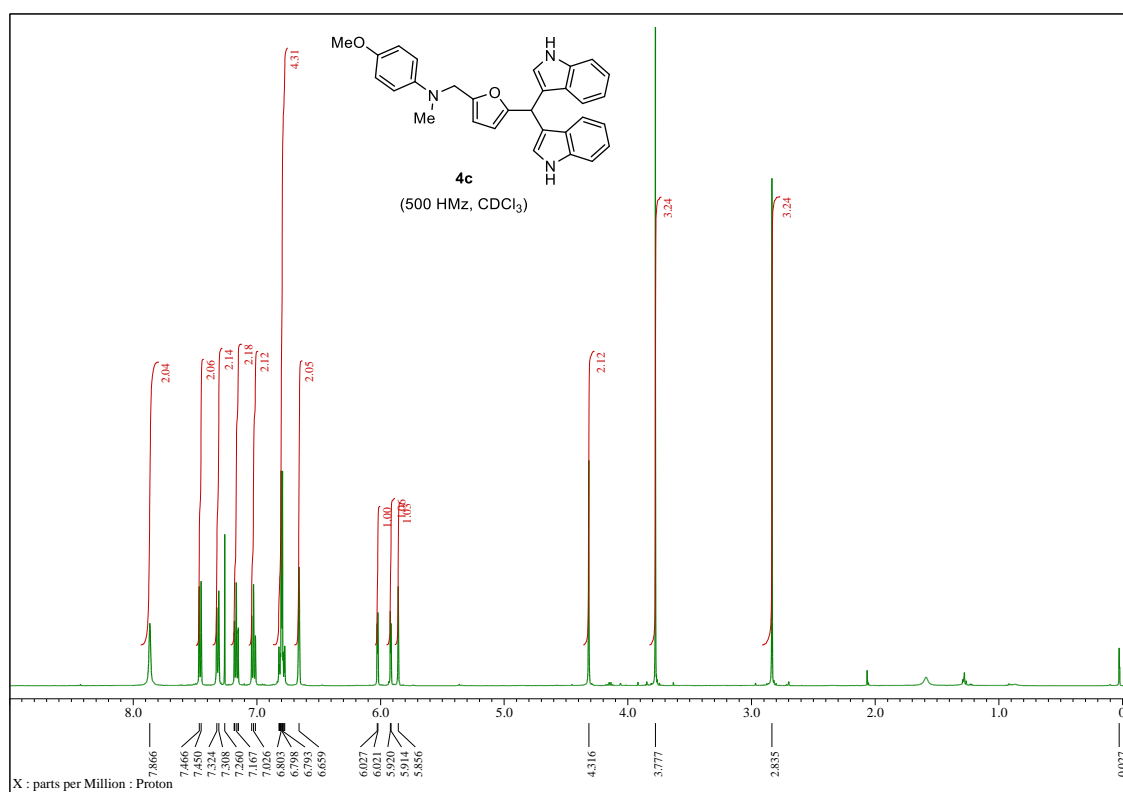

**<sup>13</sup>C NMR of 5-[N-methyl-N-(4-methoxy)phenyl-aminomethyl]-furan-2-yl bis(N-methyl-indolyl)methane (4c)**

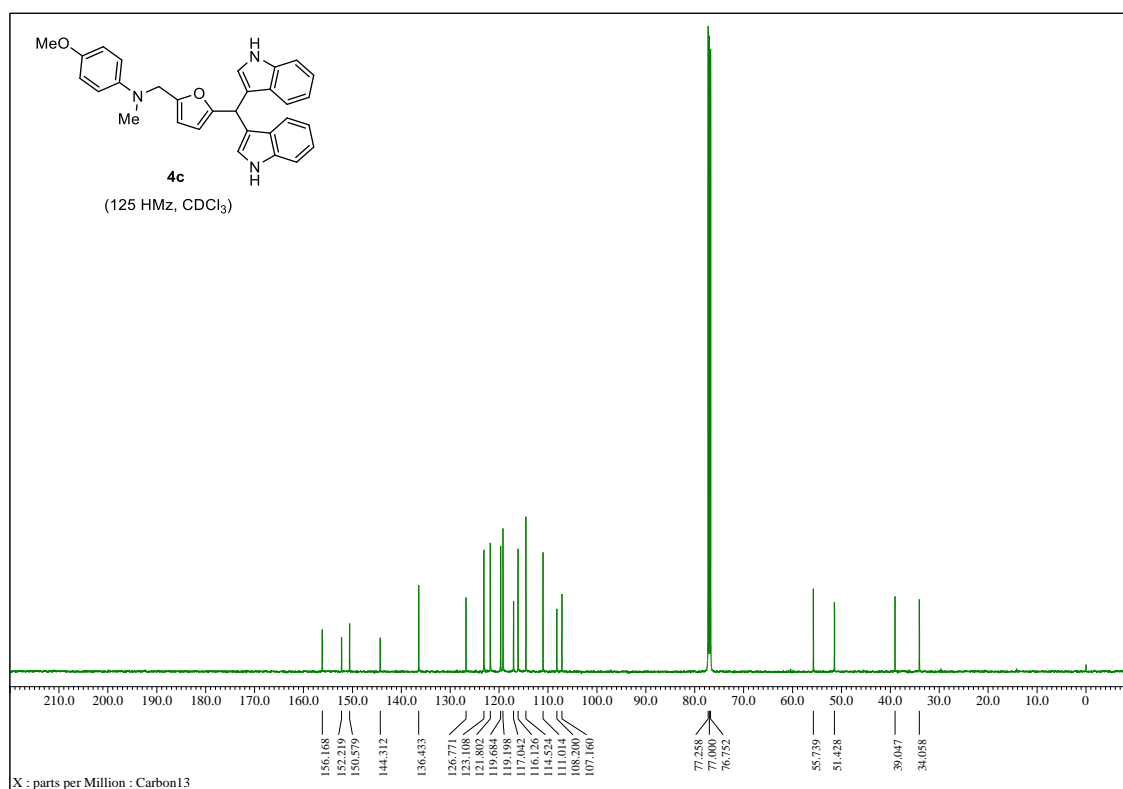

**<sup>1</sup>H NMR of 5-[N-methyl-N-(4-cyano)phenyl-aminomethyl]-furan-2-yl bis(N-methyl-indolyl)methane (4d)**

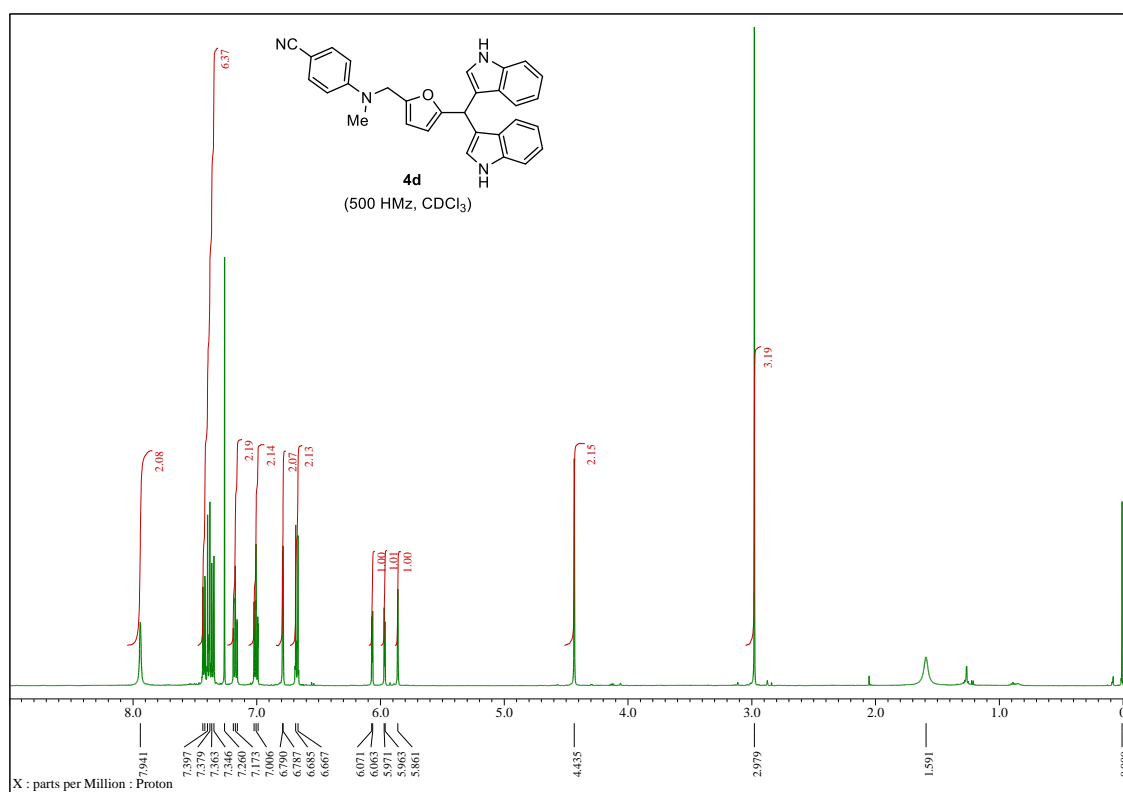

**<sup>13</sup>C NMR of 5-[N-methyl-N-(4-cyano)phenyl-aminomethyl]-furan-2-yl bis(N-methyl-indolyl)methane (4d)**

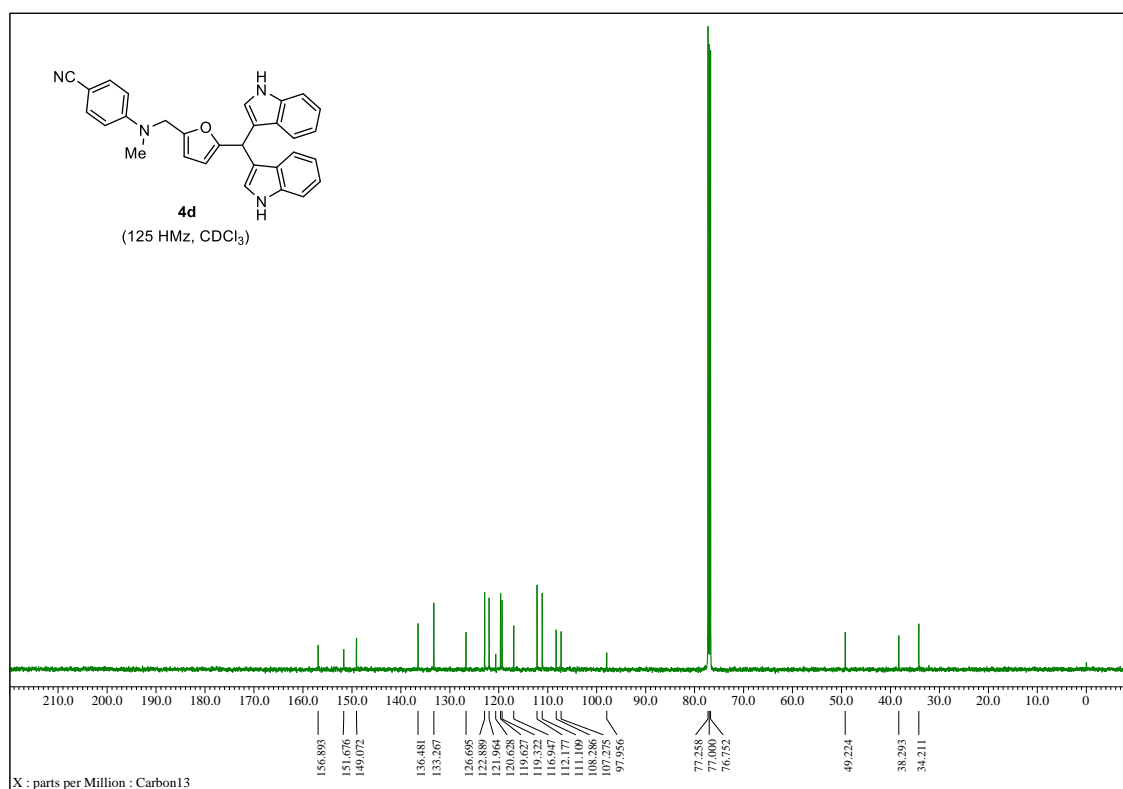

**<sup>1</sup>H NMR of 5-(*N*-pyrrolidinylmethyl)-furan-2-yl bis(*N*-methyl-indolyl)methane (4e)**

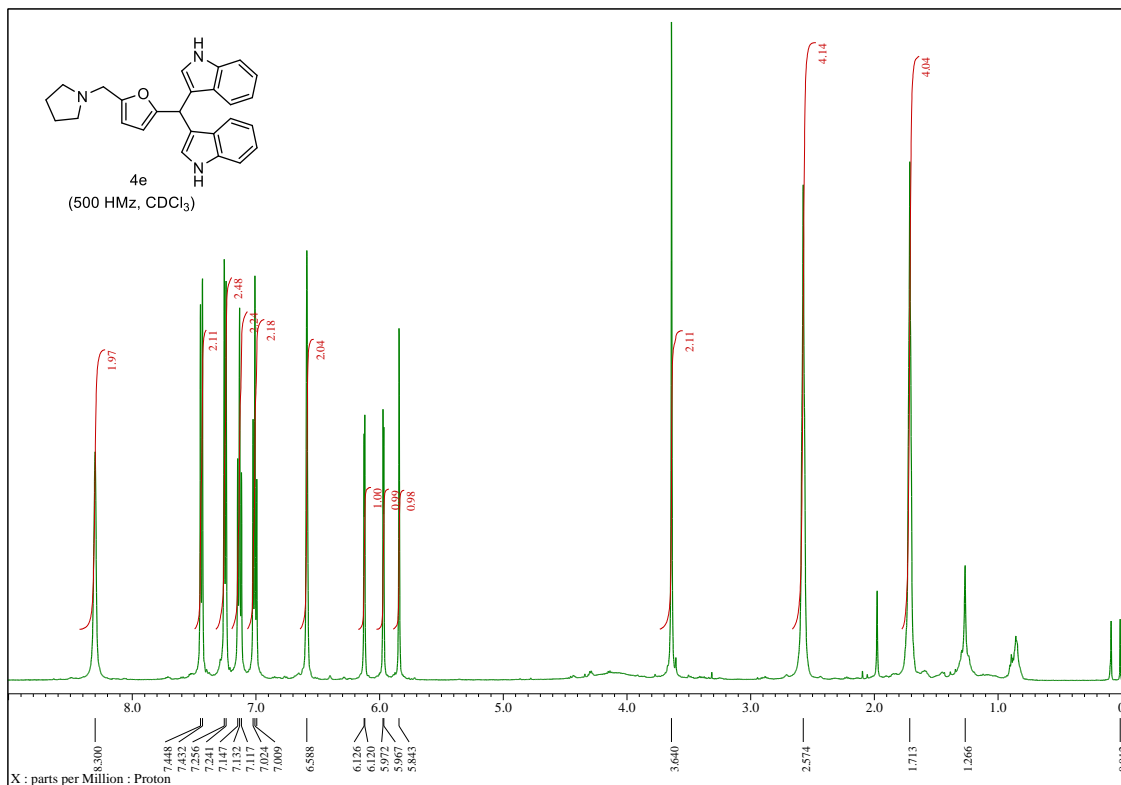

**<sup>13</sup>C NMR of 5-(*N*-pyrrolidinylmethyl)-furan-2-yl bis(*N*-methyl-indolyl)methane (4e)**

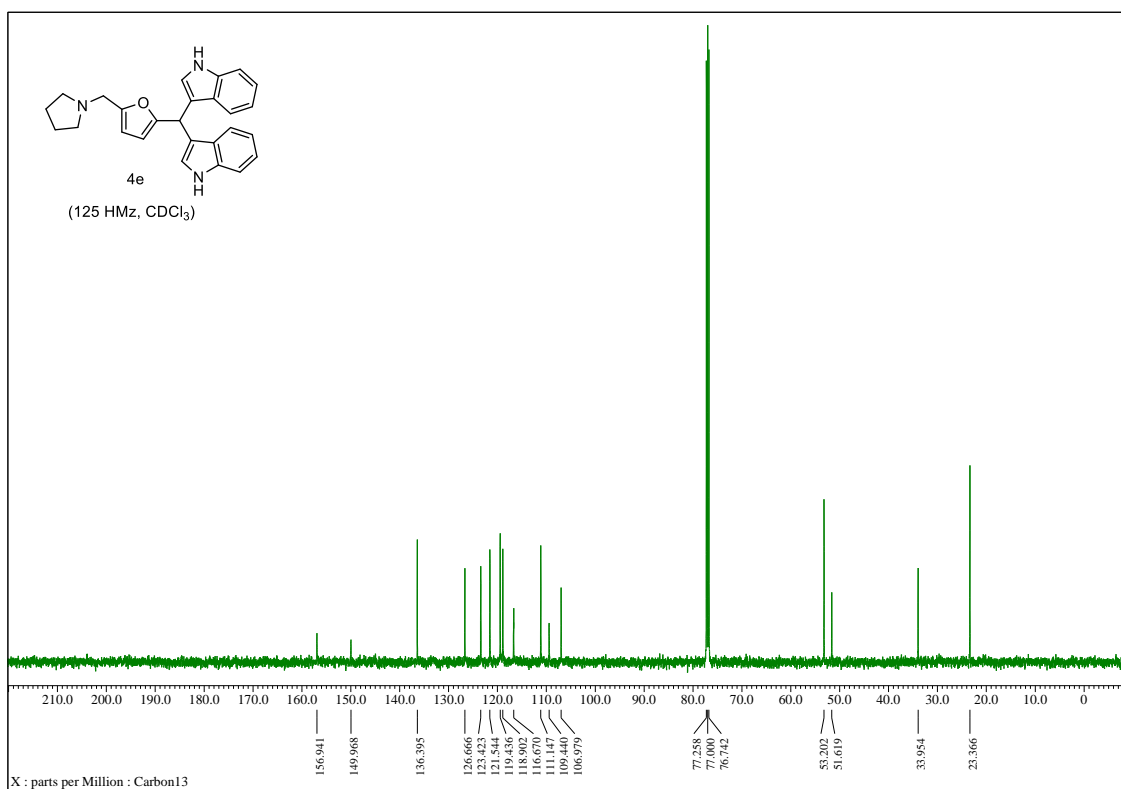

### <sup>1</sup>H NMR of furan-2-yl bis(indolyl)methane (6a)

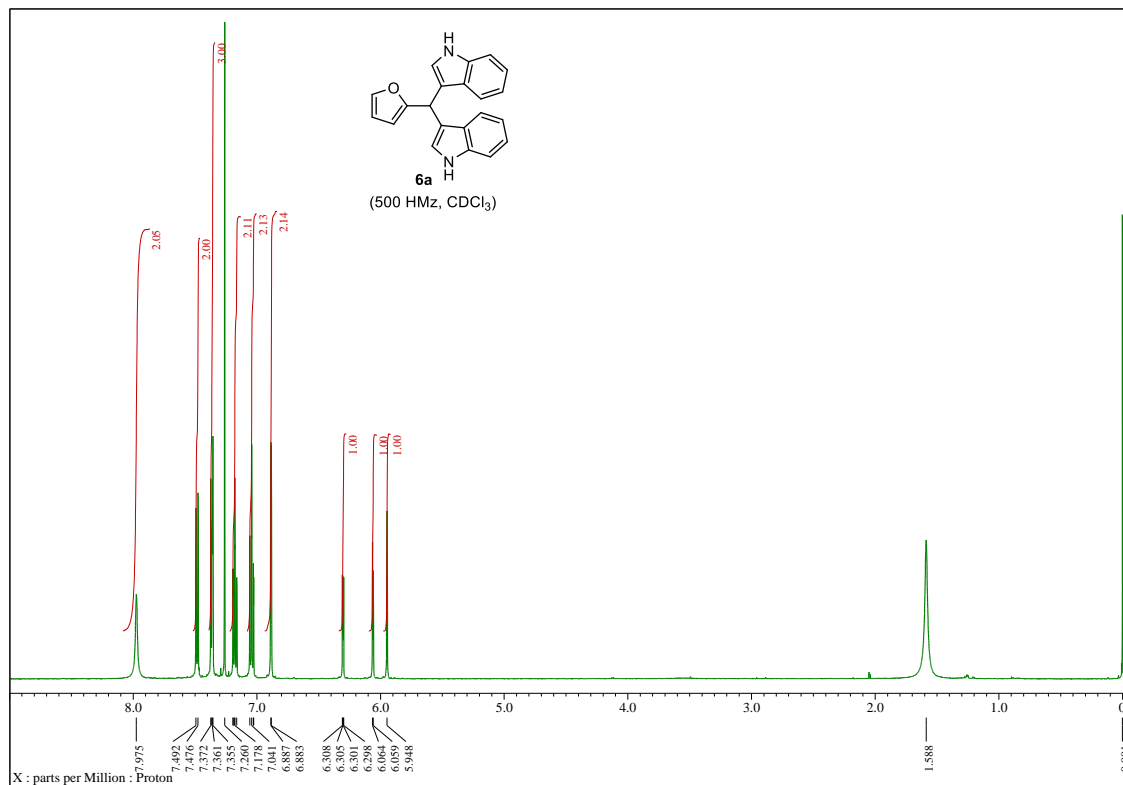

### <sup>13</sup>C NMR of furan-2-yl bis(indolyl)methane (6a)

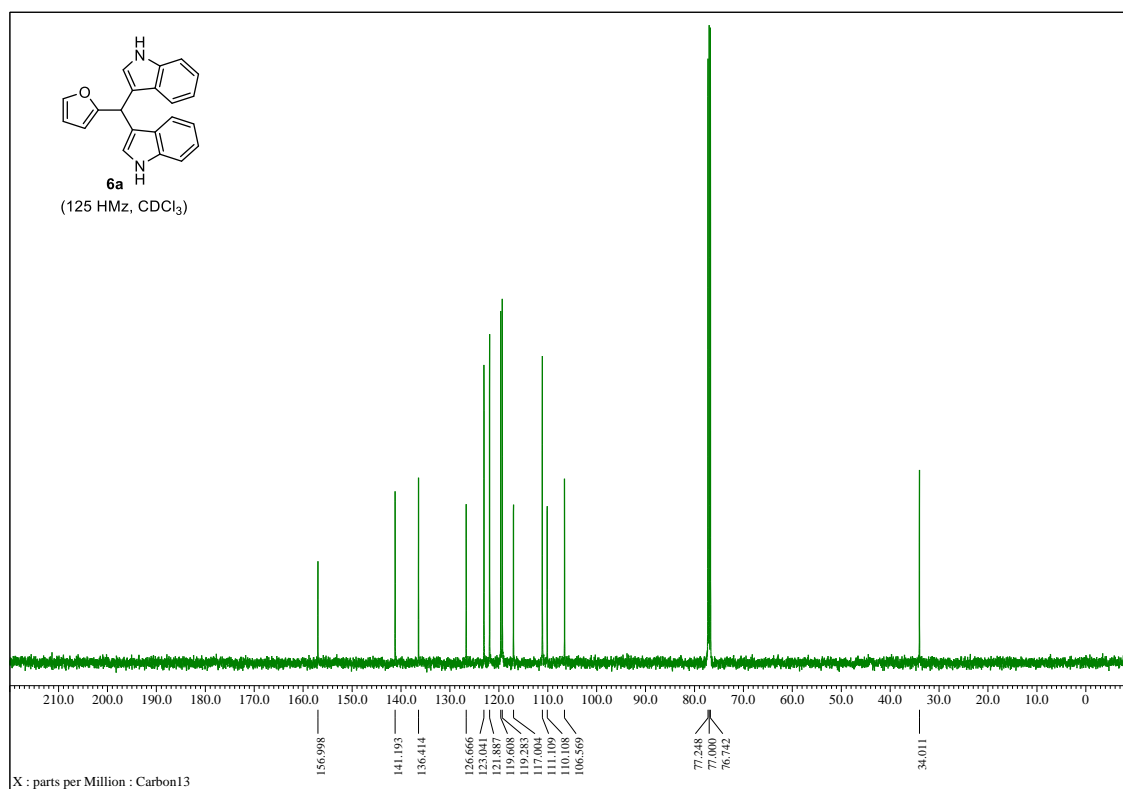



### <sup>1</sup>H NMR of 5-hydroxymethyl-furan-2-yl bis(indolyl)methane (6b)

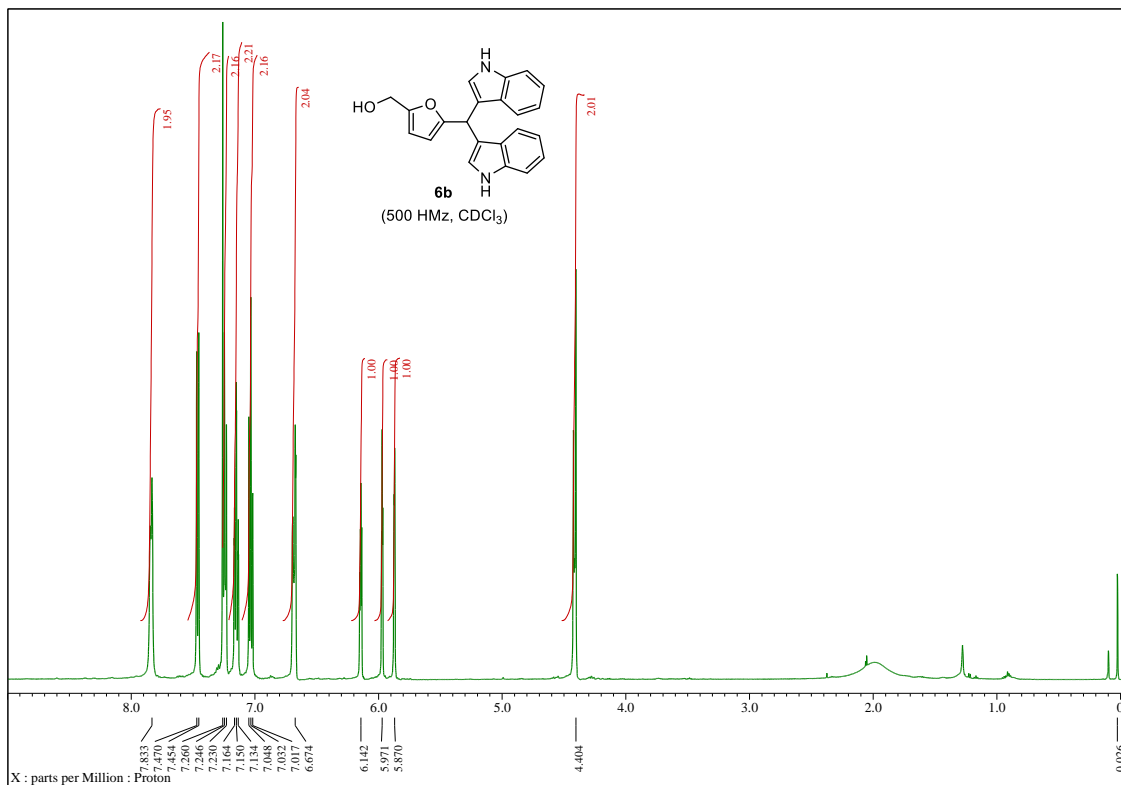

### <sup>13</sup>C NMR of 5-hydroxymethyl-furan-2-yl bis(indolyl)methane (6b)

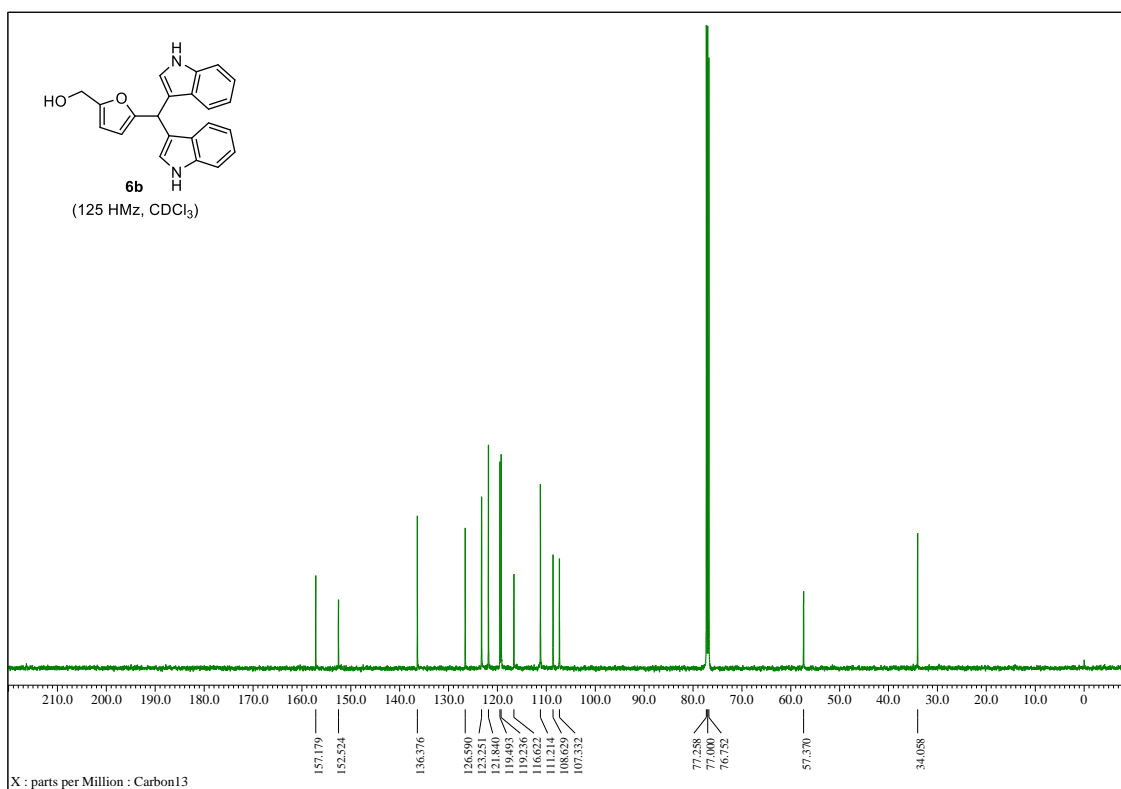

### <sup>1</sup>H NMR of phenyl bis(indolyl)methane (6c)

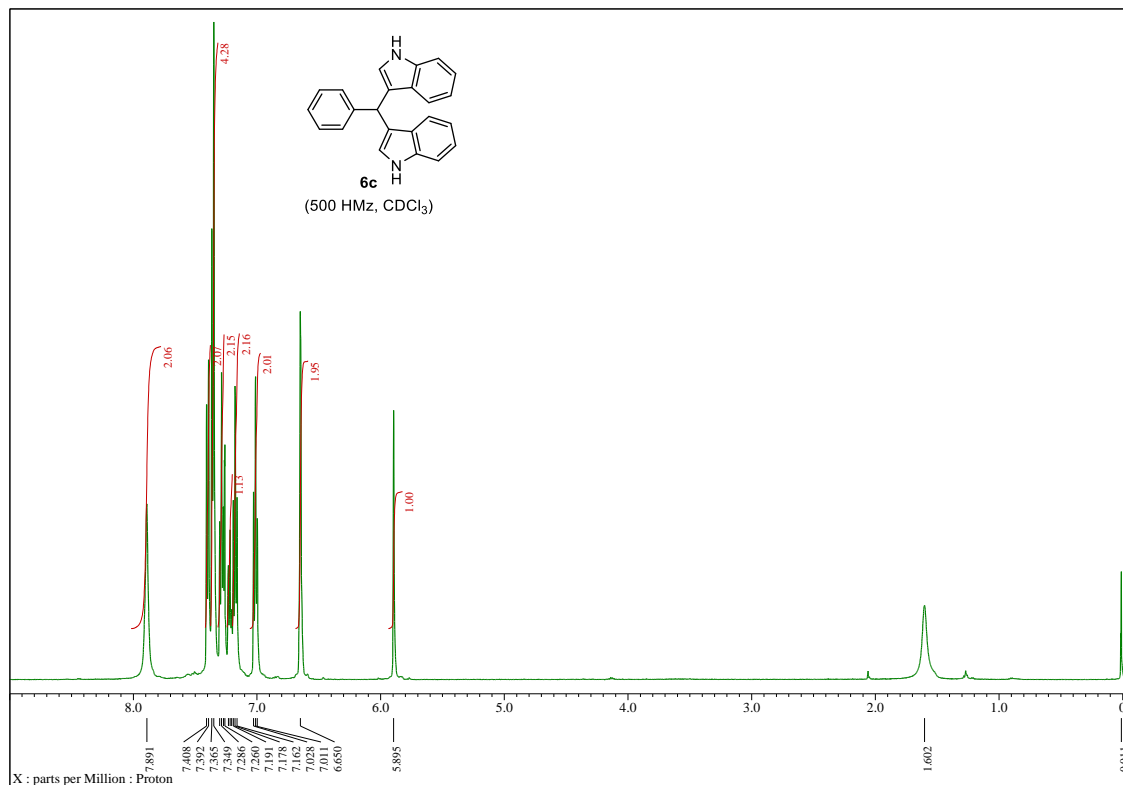

### <sup>13</sup>C NMR of phenyl bis(indolyl)methane (6c)

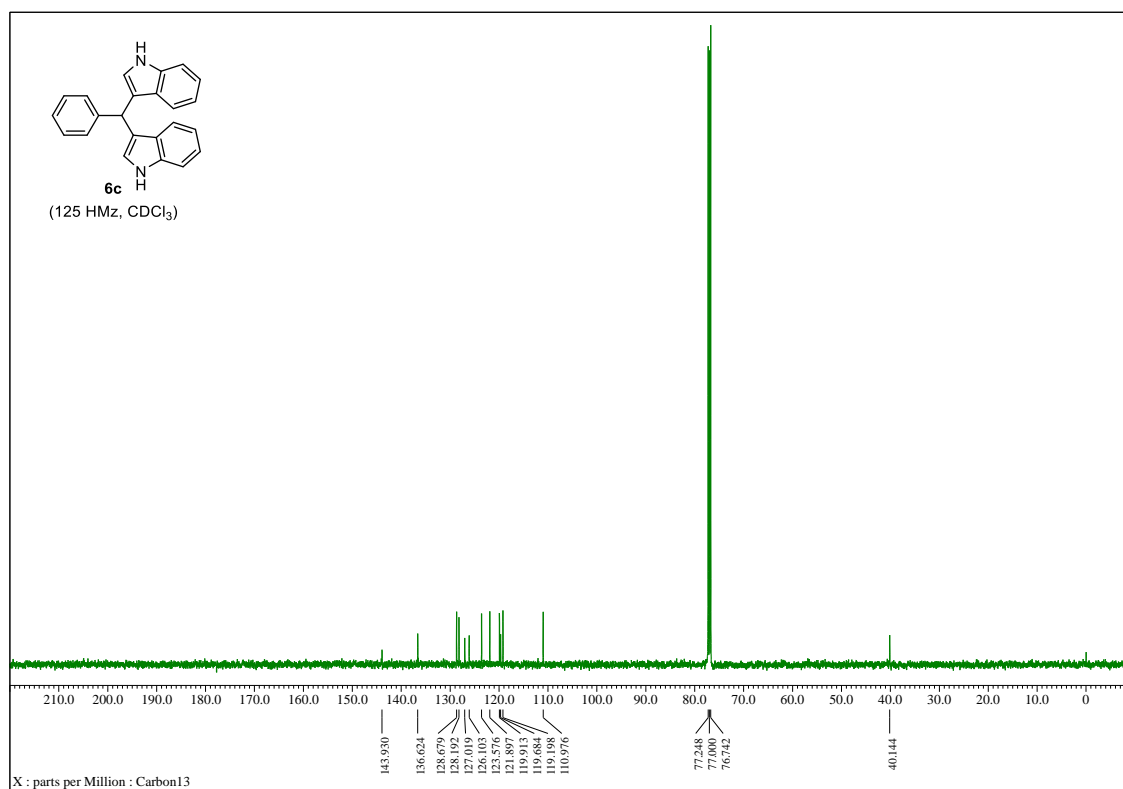

### <sup>1</sup>H NMR of 1,1-bis(indolyl)hexane (6d)

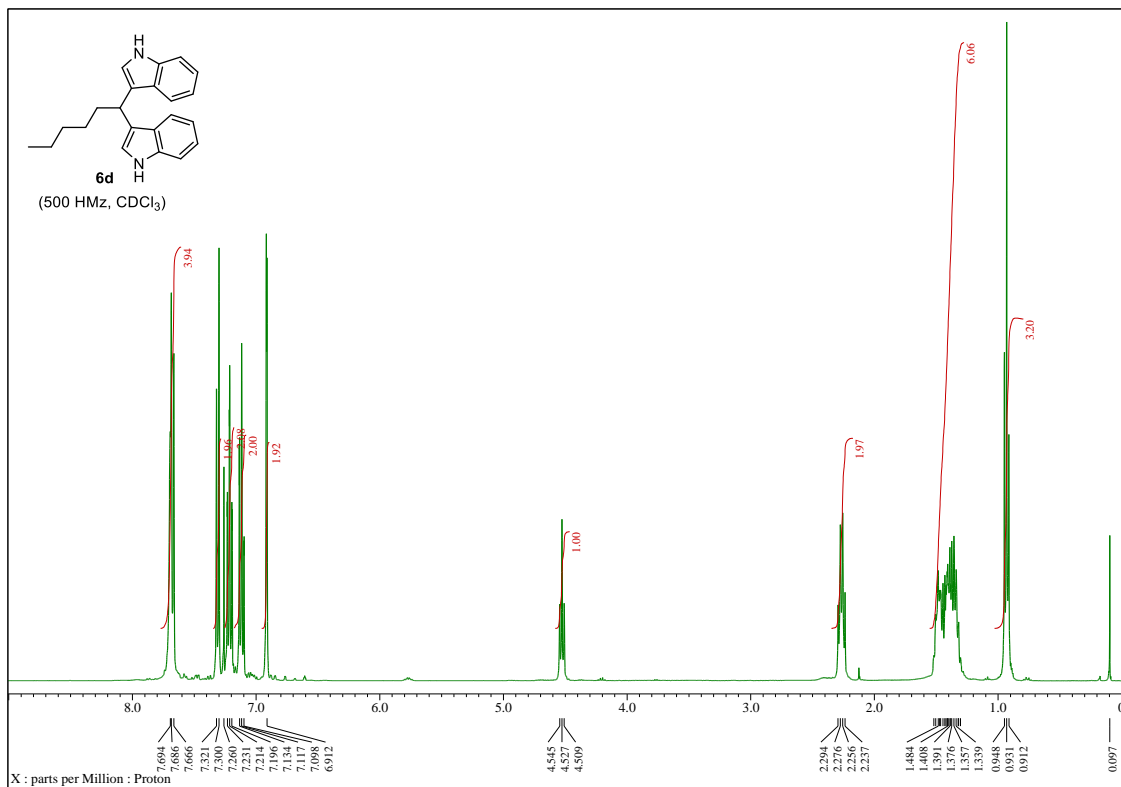

### <sup>13</sup>C NMR of 1,1-bis(indolyl)hexane (6d)

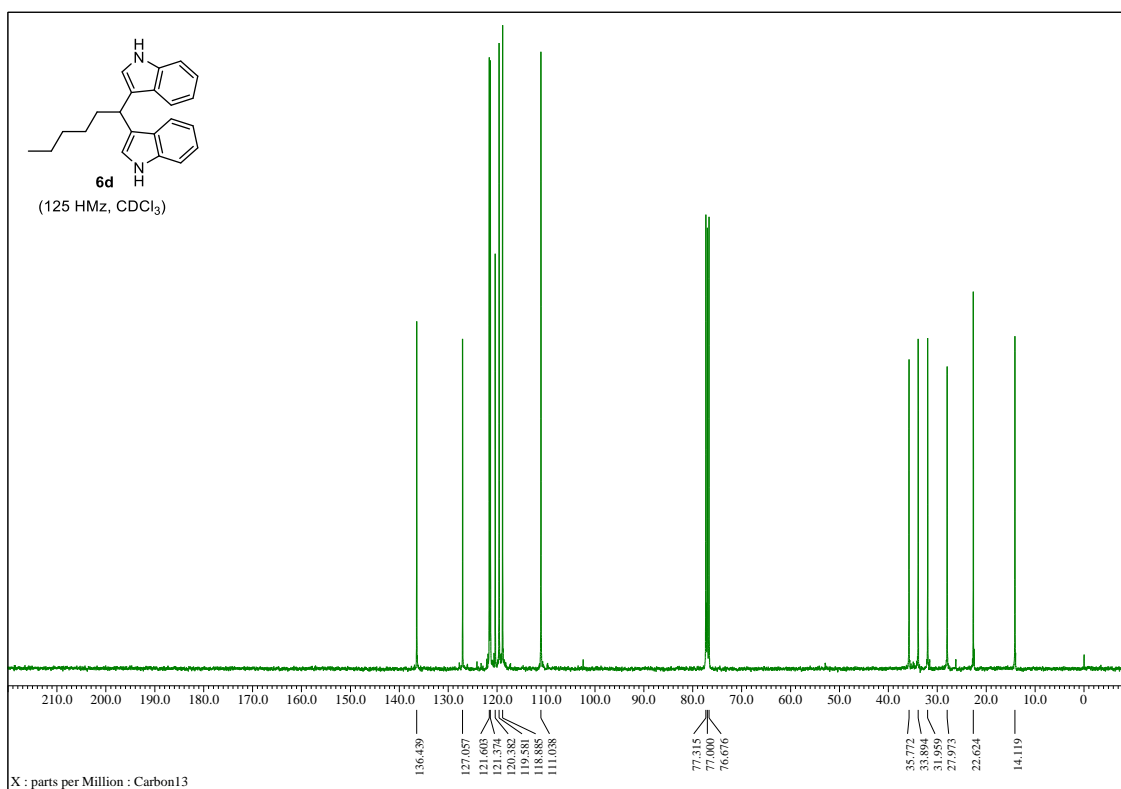

### <sup>1</sup>H NMR of diindolylmethane (6e)

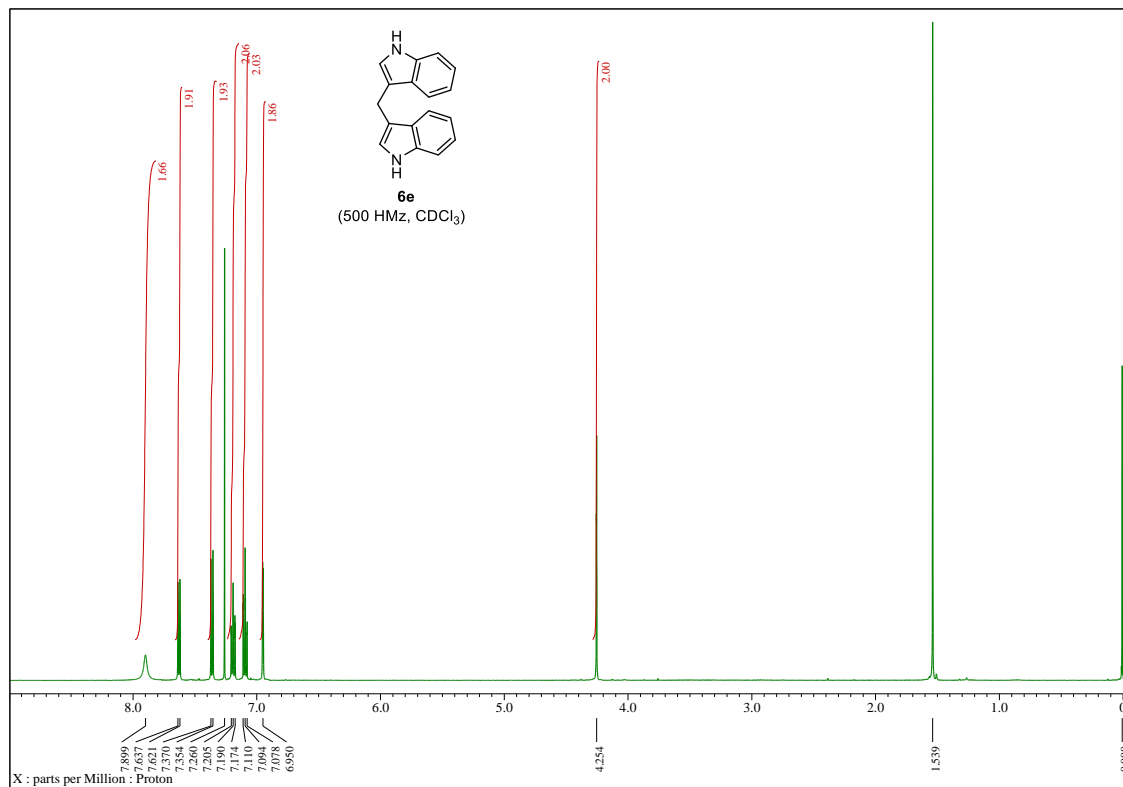

### <sup>13</sup>C NMR of diindolylmethane (6e)

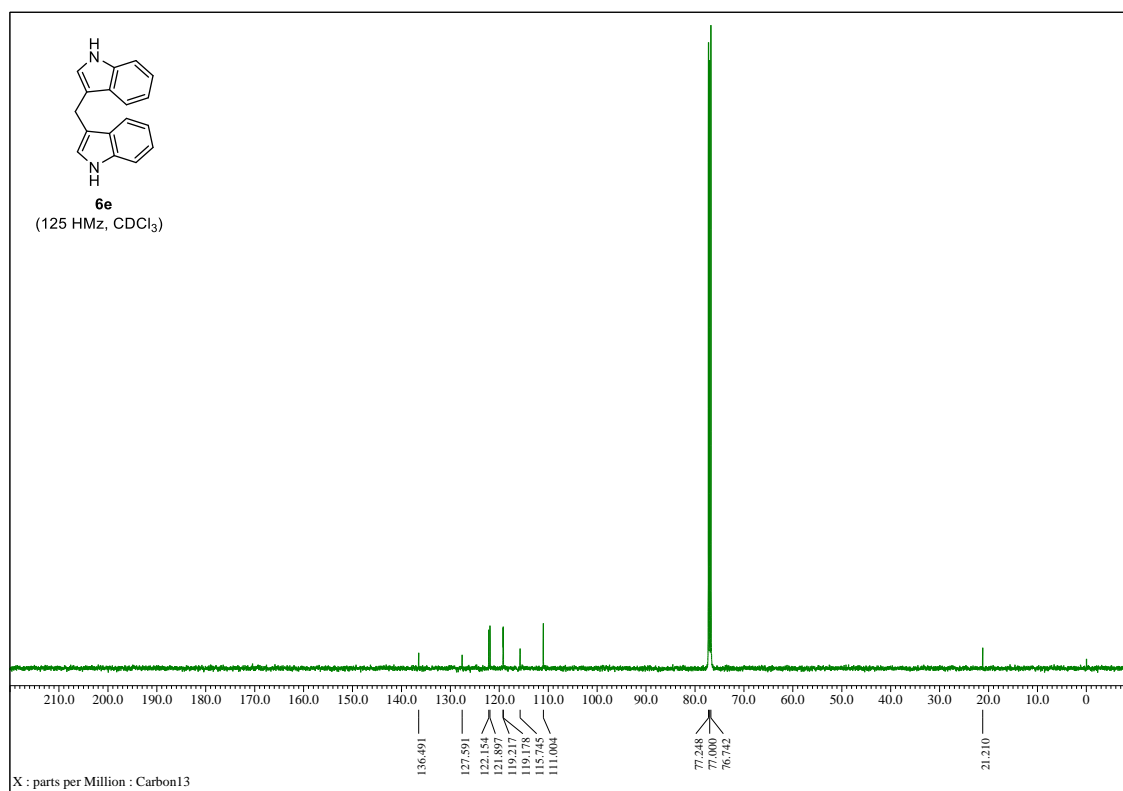

Supplement: d4ob00046c1.pdf [file d4ob00046c1.pdf]
